# Supplementary figures and images for: C-7 modified flavonoids as novel tyrosyl-tRNA synthetase inhibitors
Source: Royal Society of Chemistry journal article supplement (doi:10.1039/c6ra28061g), 2017-01-01

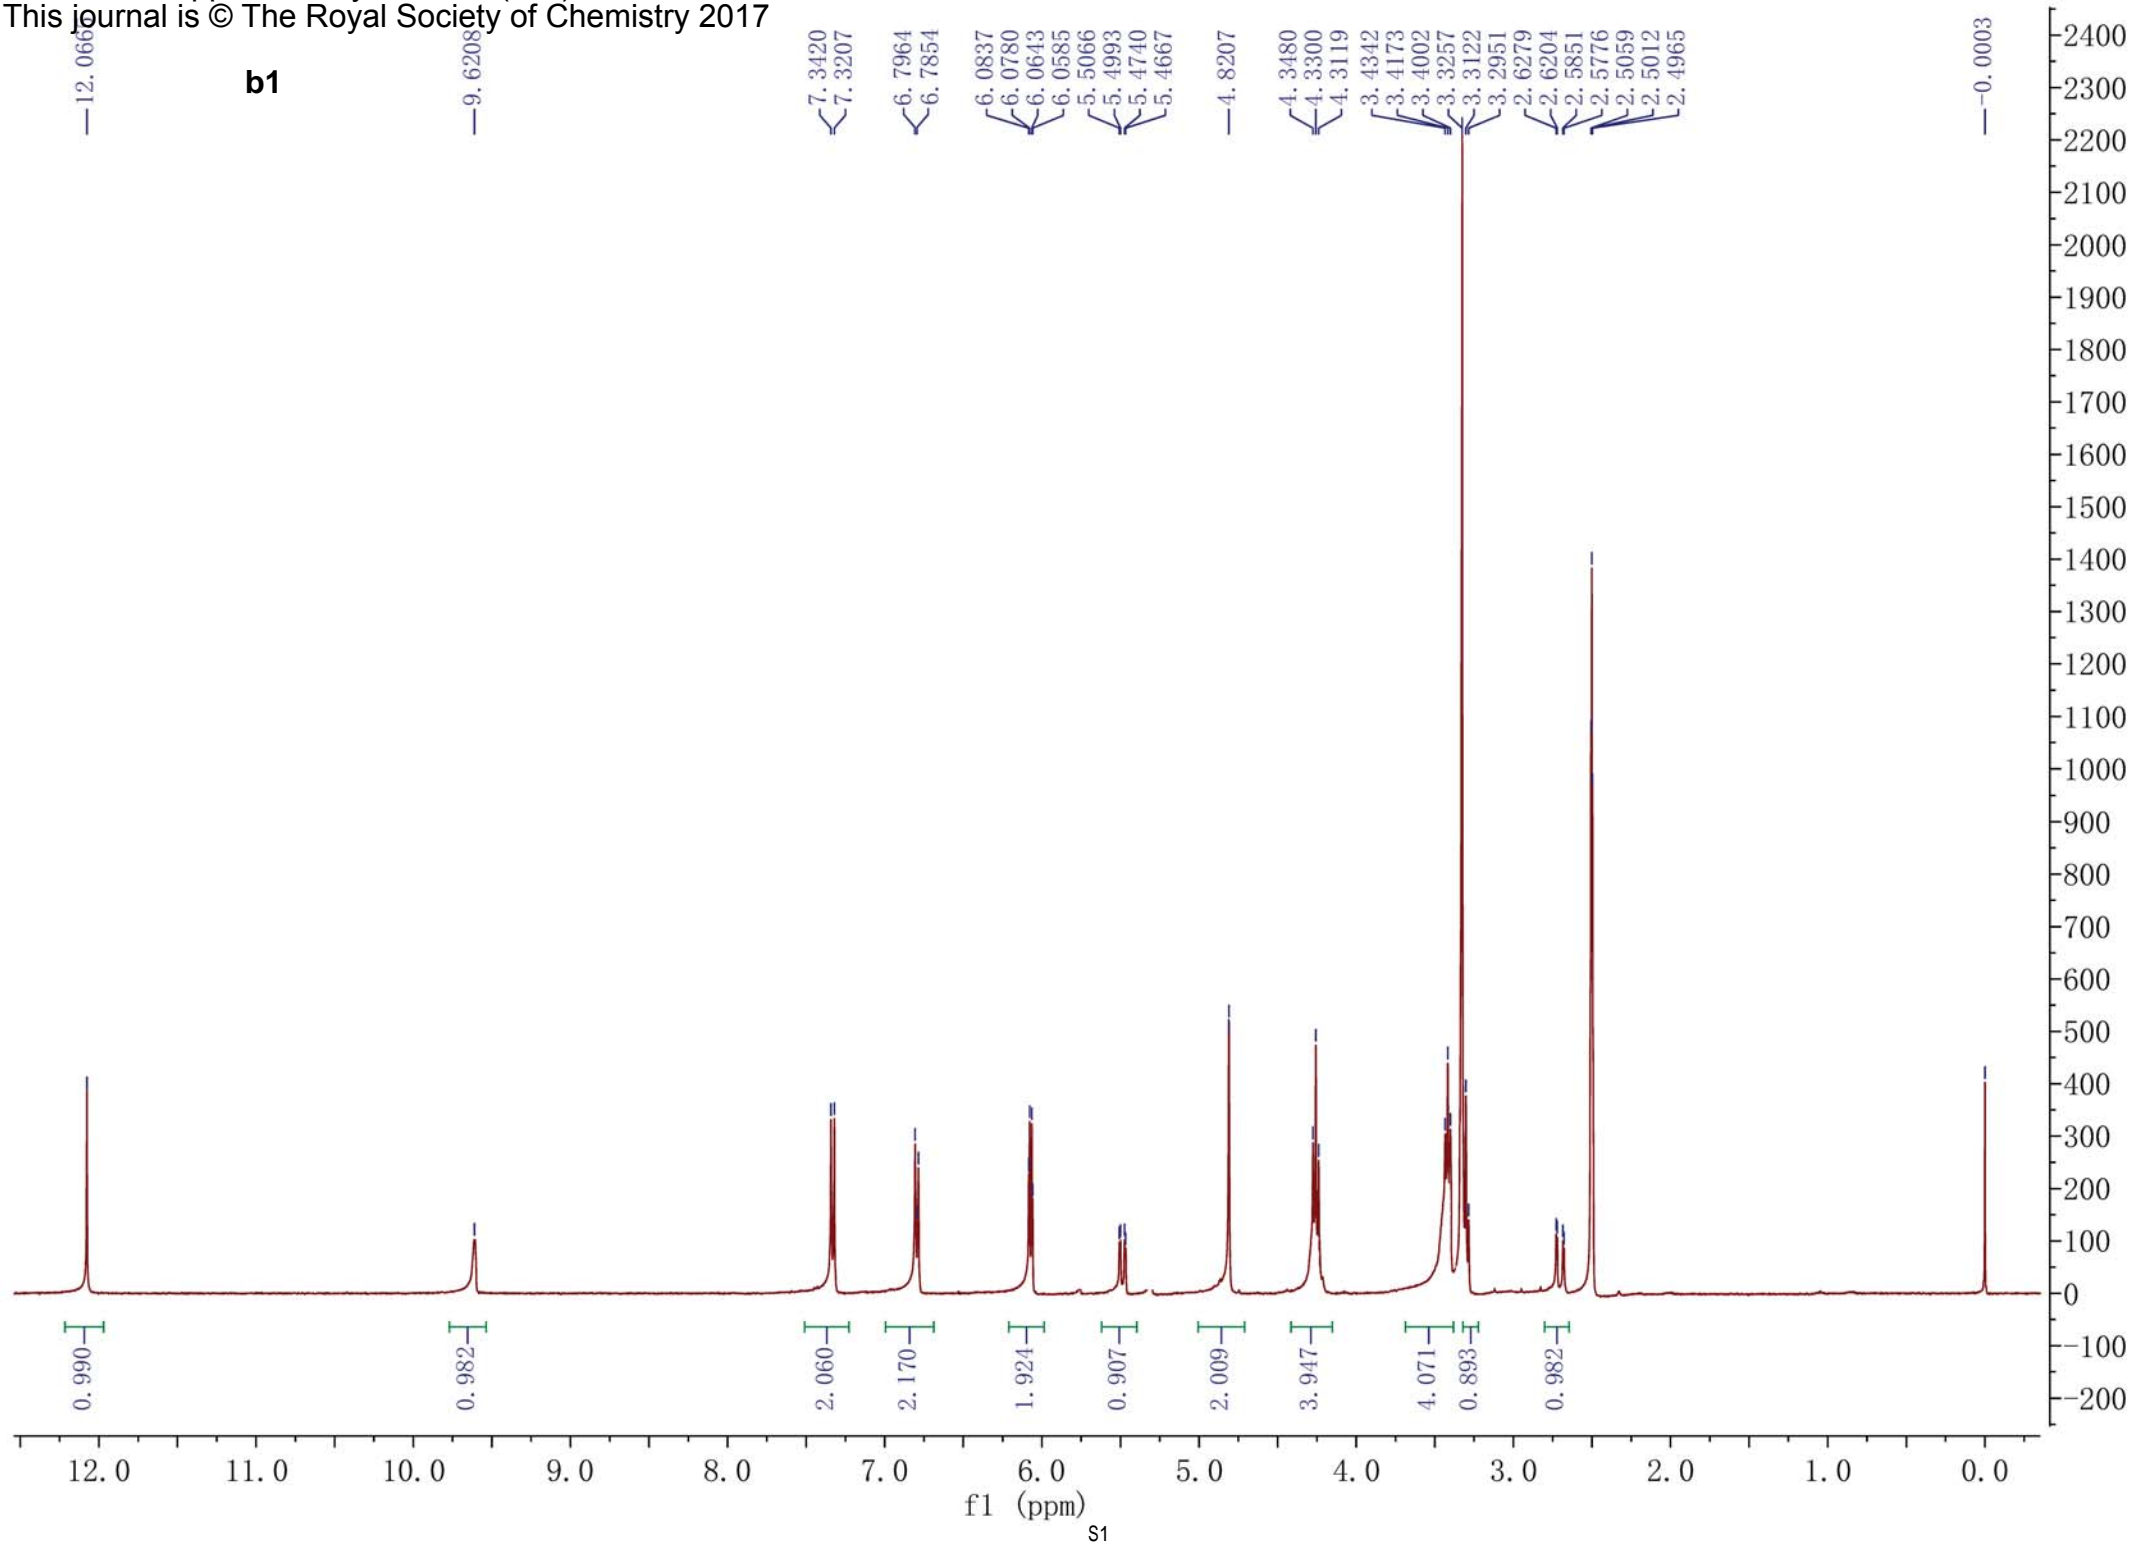

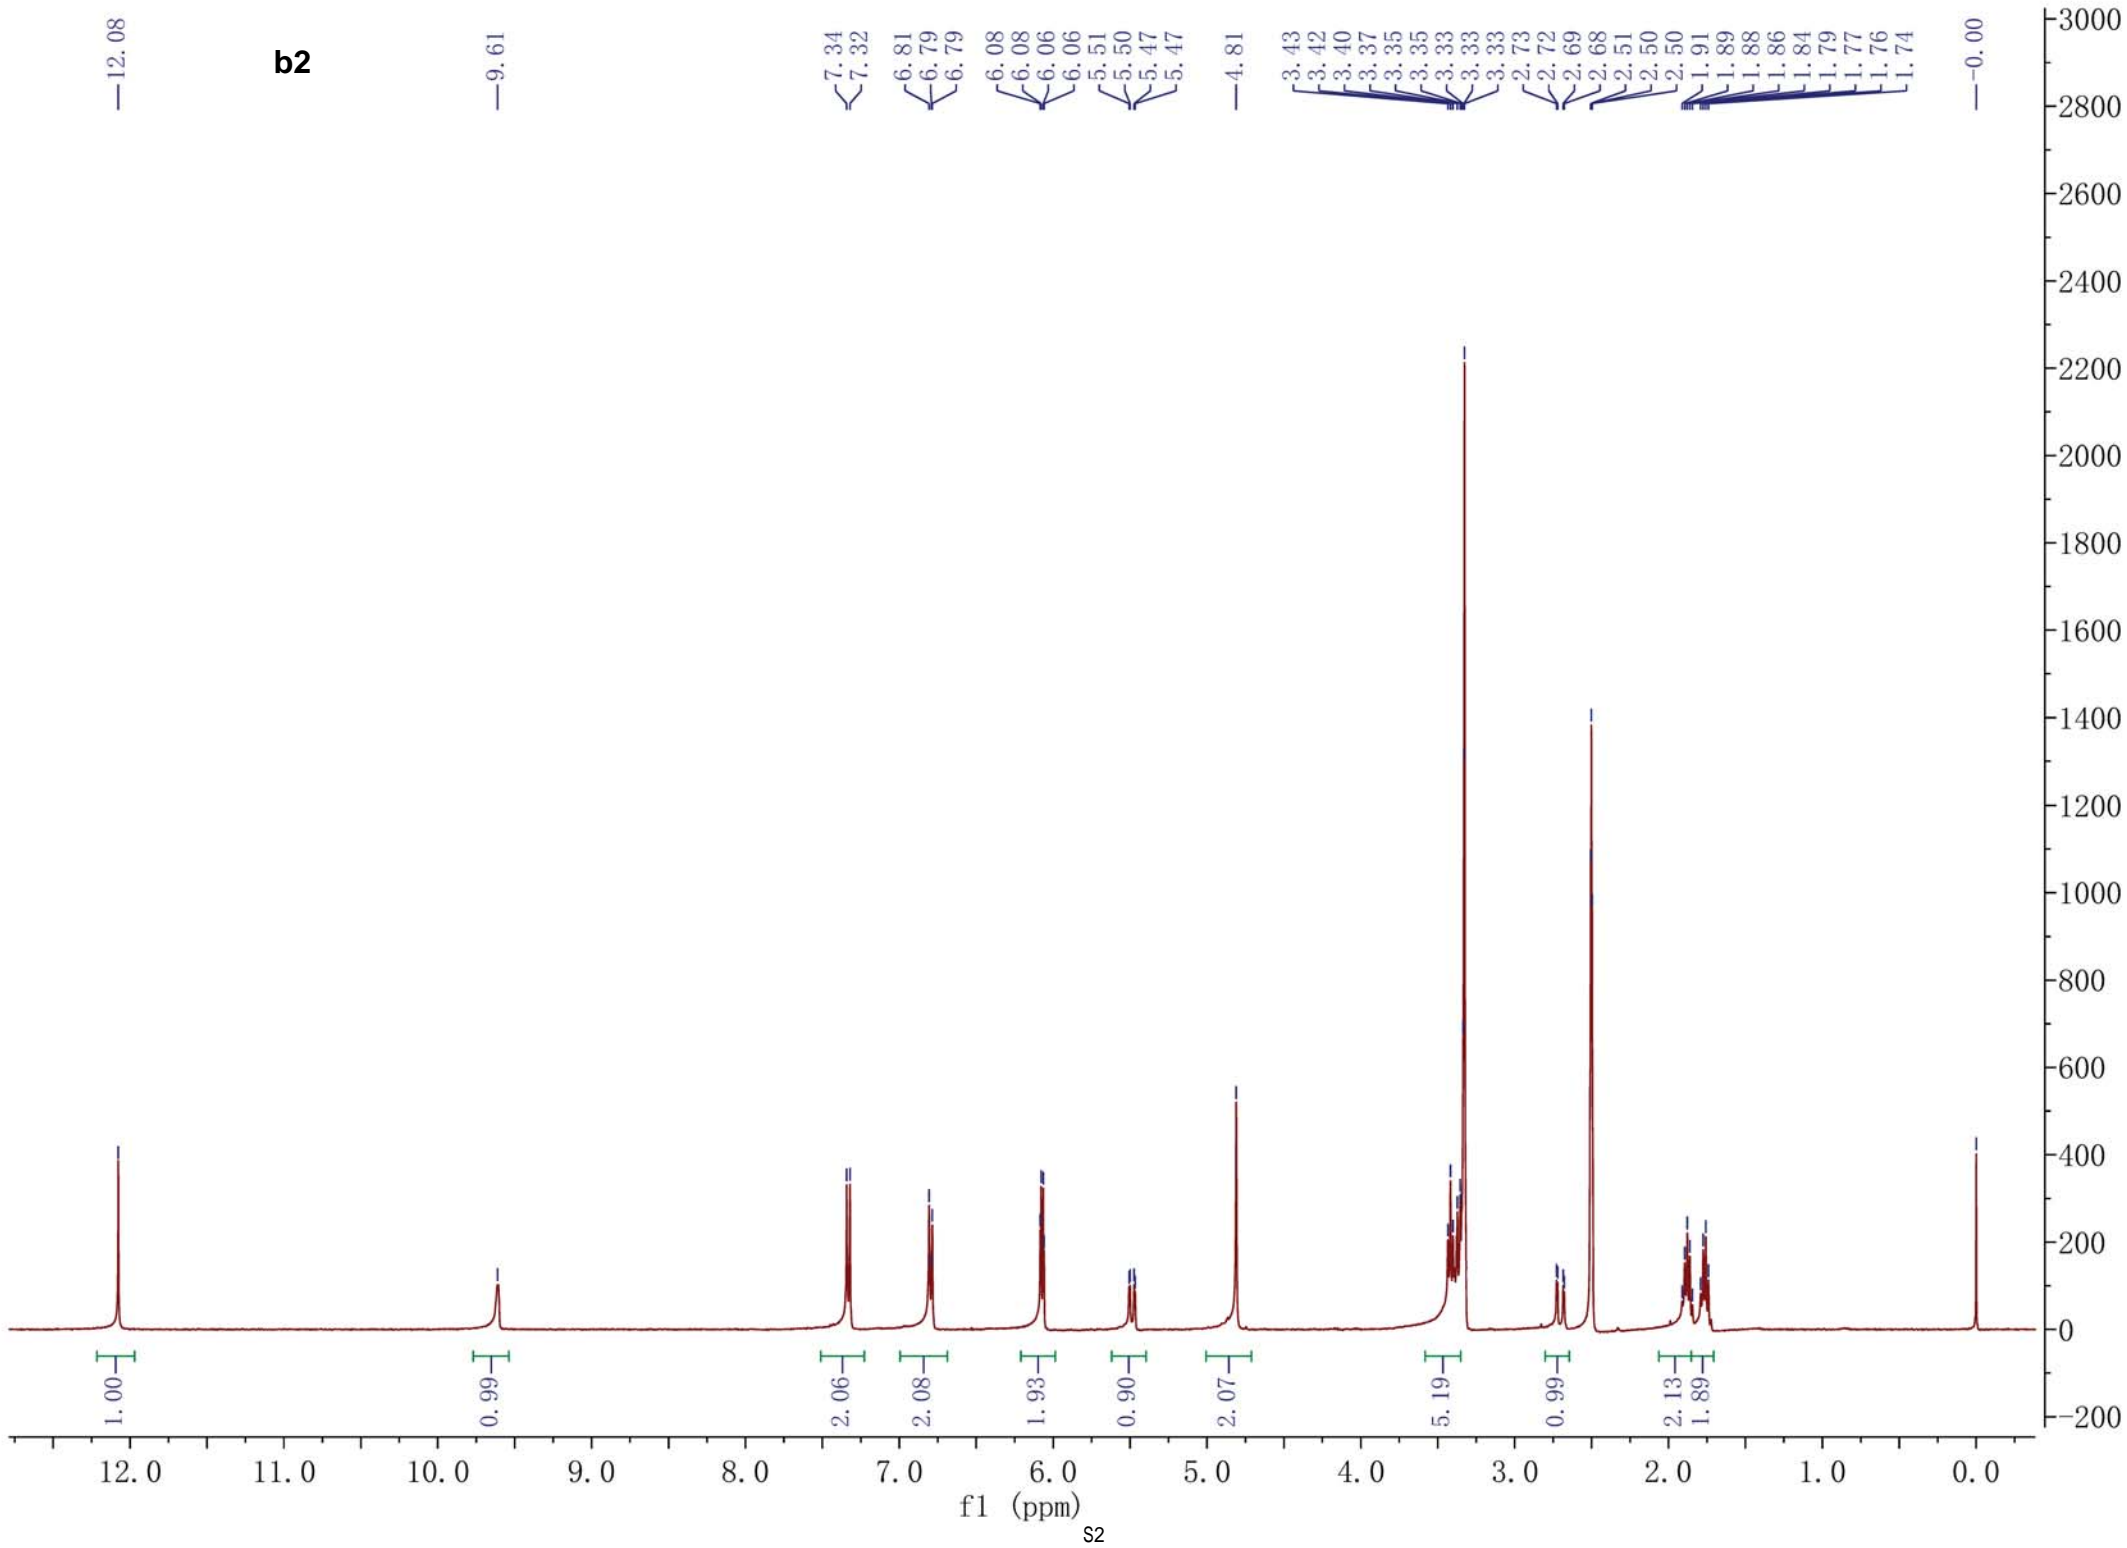

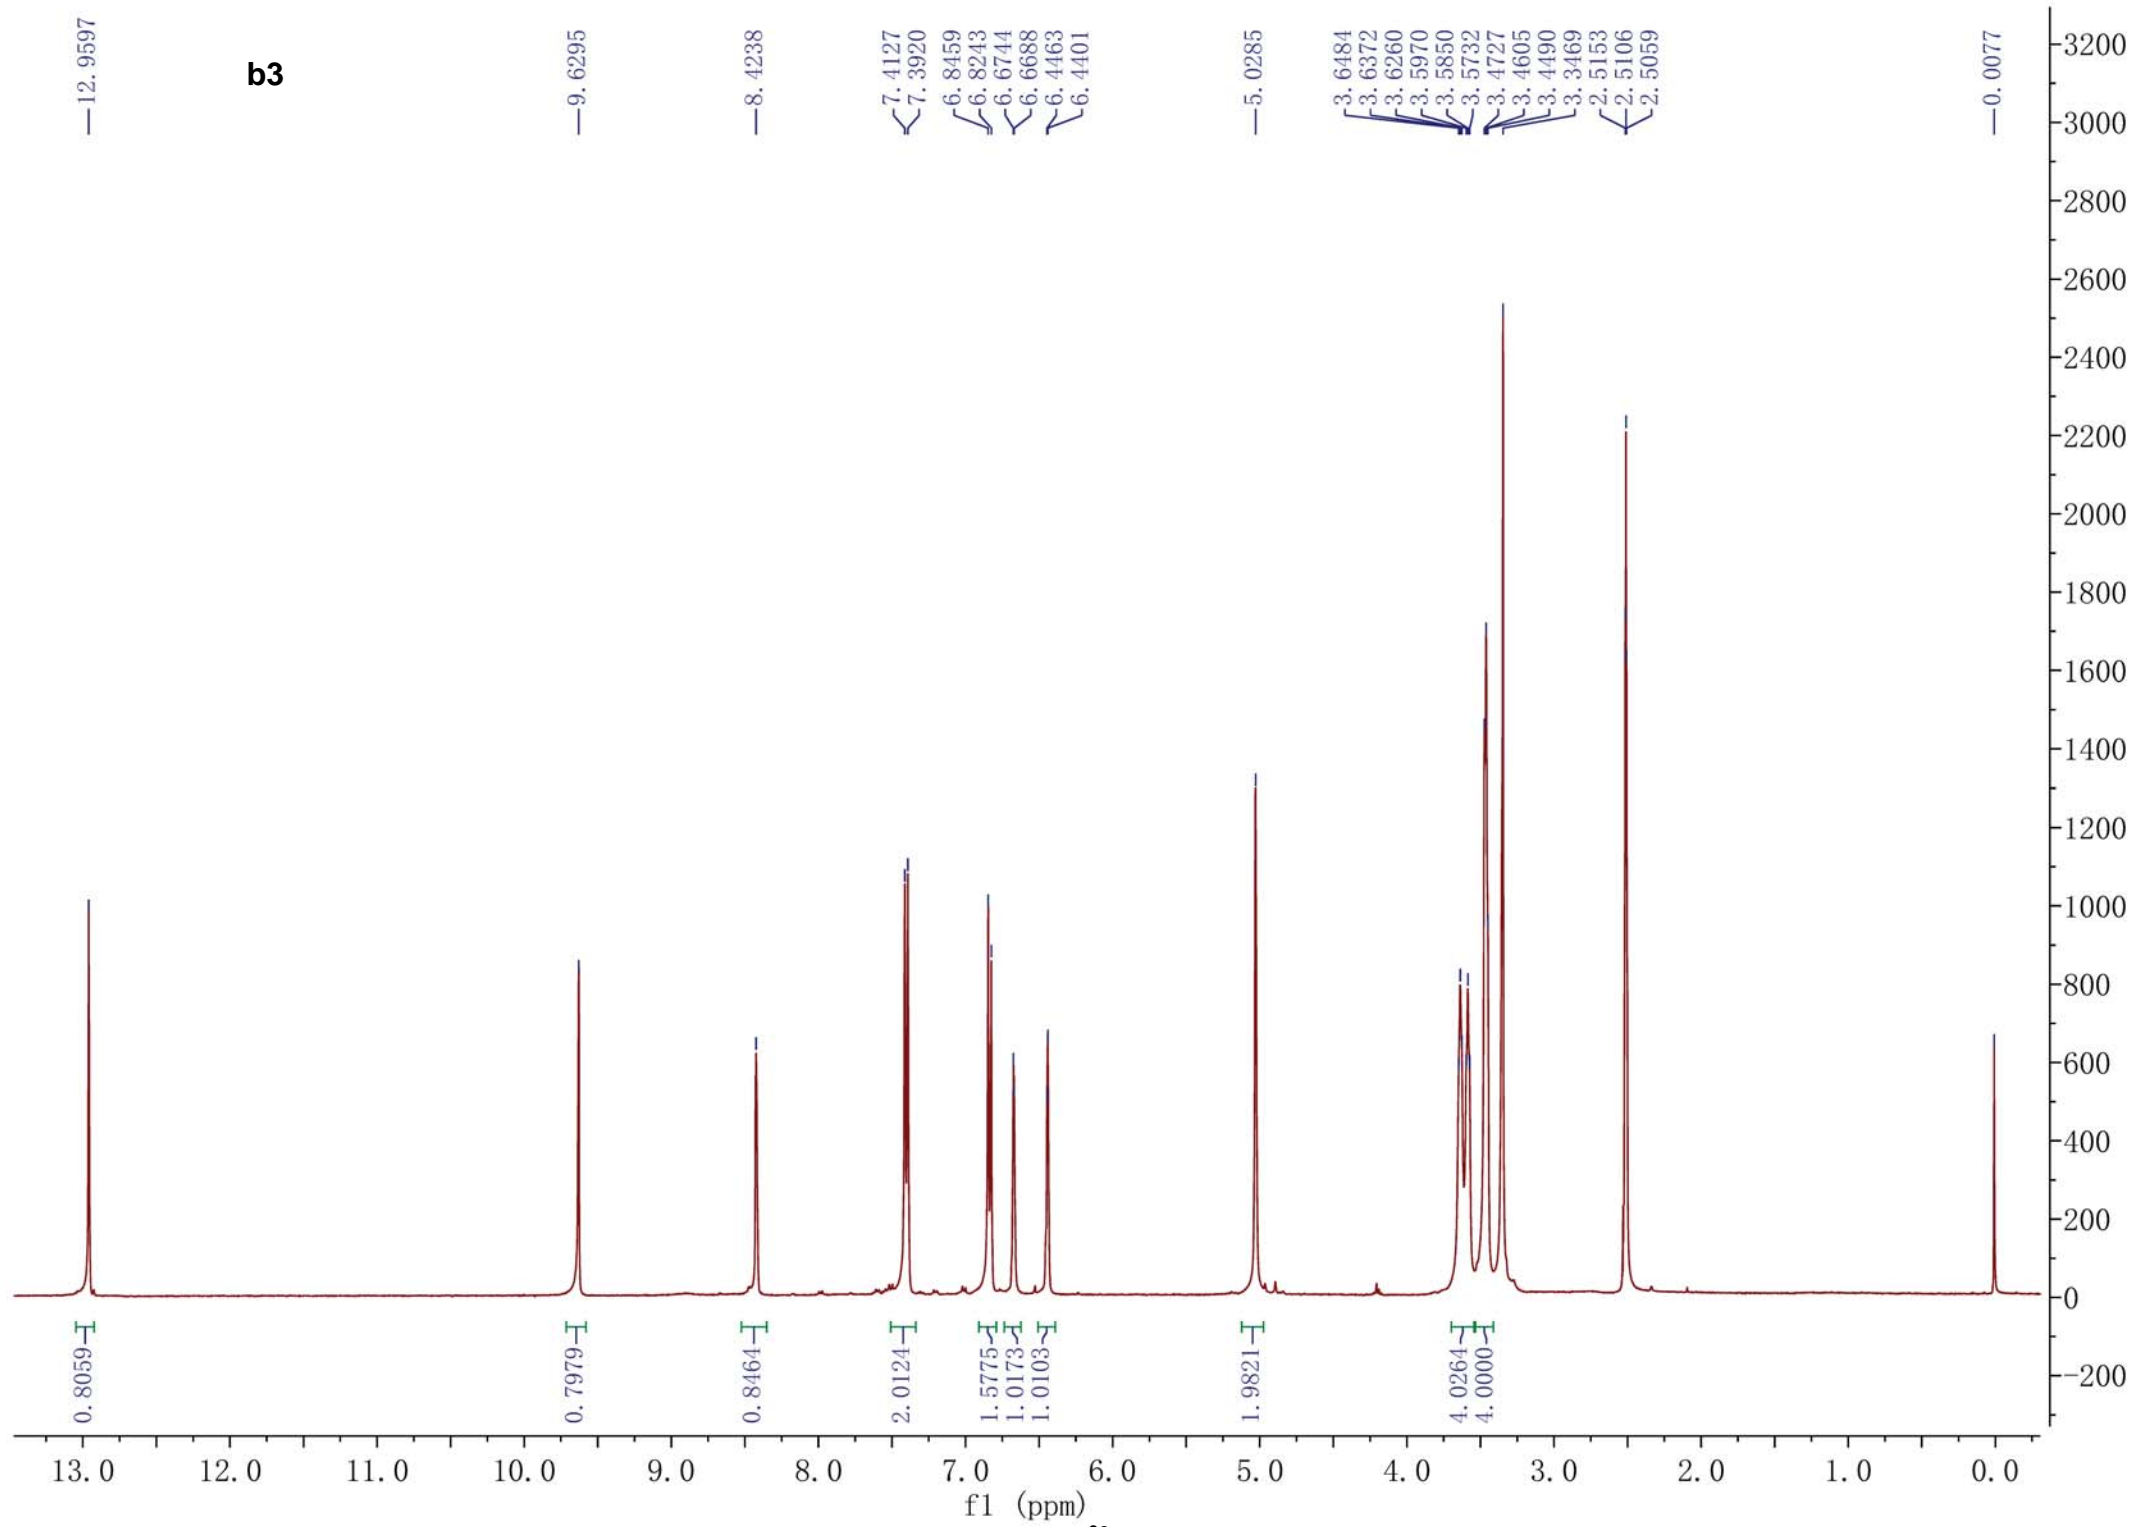

—12.9626

**b4**

—9.6336

8.4347  
8.1849  
8.1705  
8.1560  
7.4108  
7.3893  
6.8459  
6.8245  
6.6656  
6.6599  
6.4618  
6.4561

—4.6238

3.3532  
3.1660  
3.1495  
3.1333  
3.1166  
2.5153  
2.5107  
2.5059  
1.4640  
1.4467  
1.4406  
1.4289  
1.4230  
1.4097  
1.3917  
1.3224  
1.3040  
1.2853  
1.2667  
1.2485  
1.2340  
1.2302  
0.8914  
0.8730  
0.8548  
0.0060

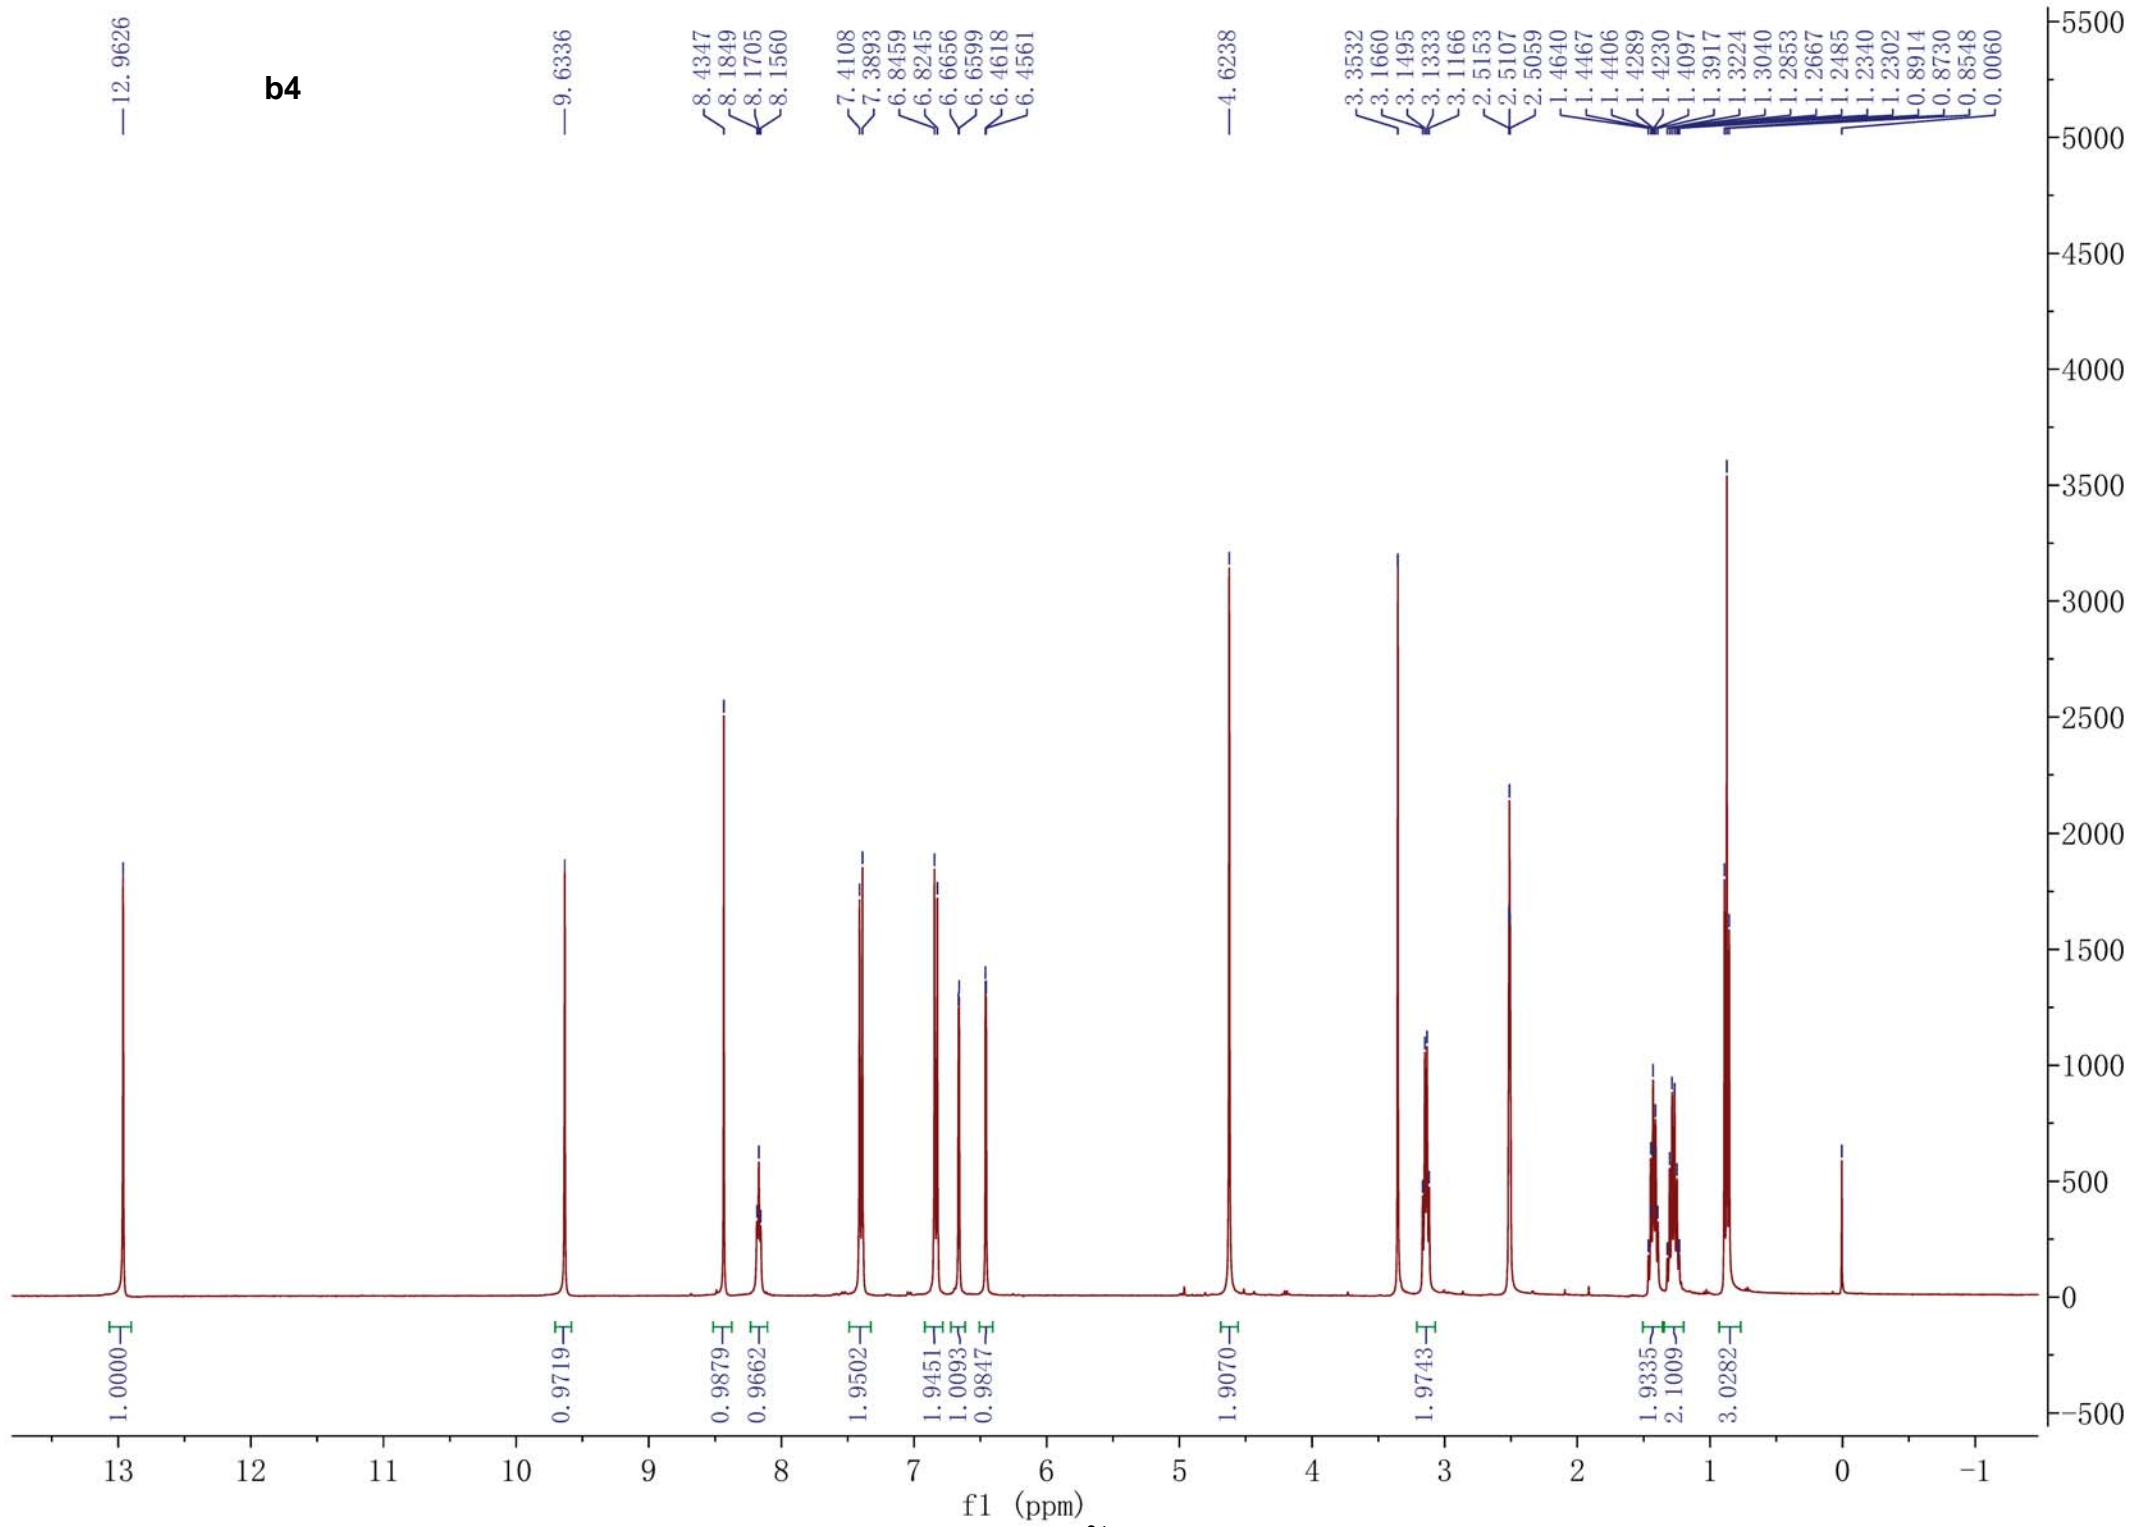

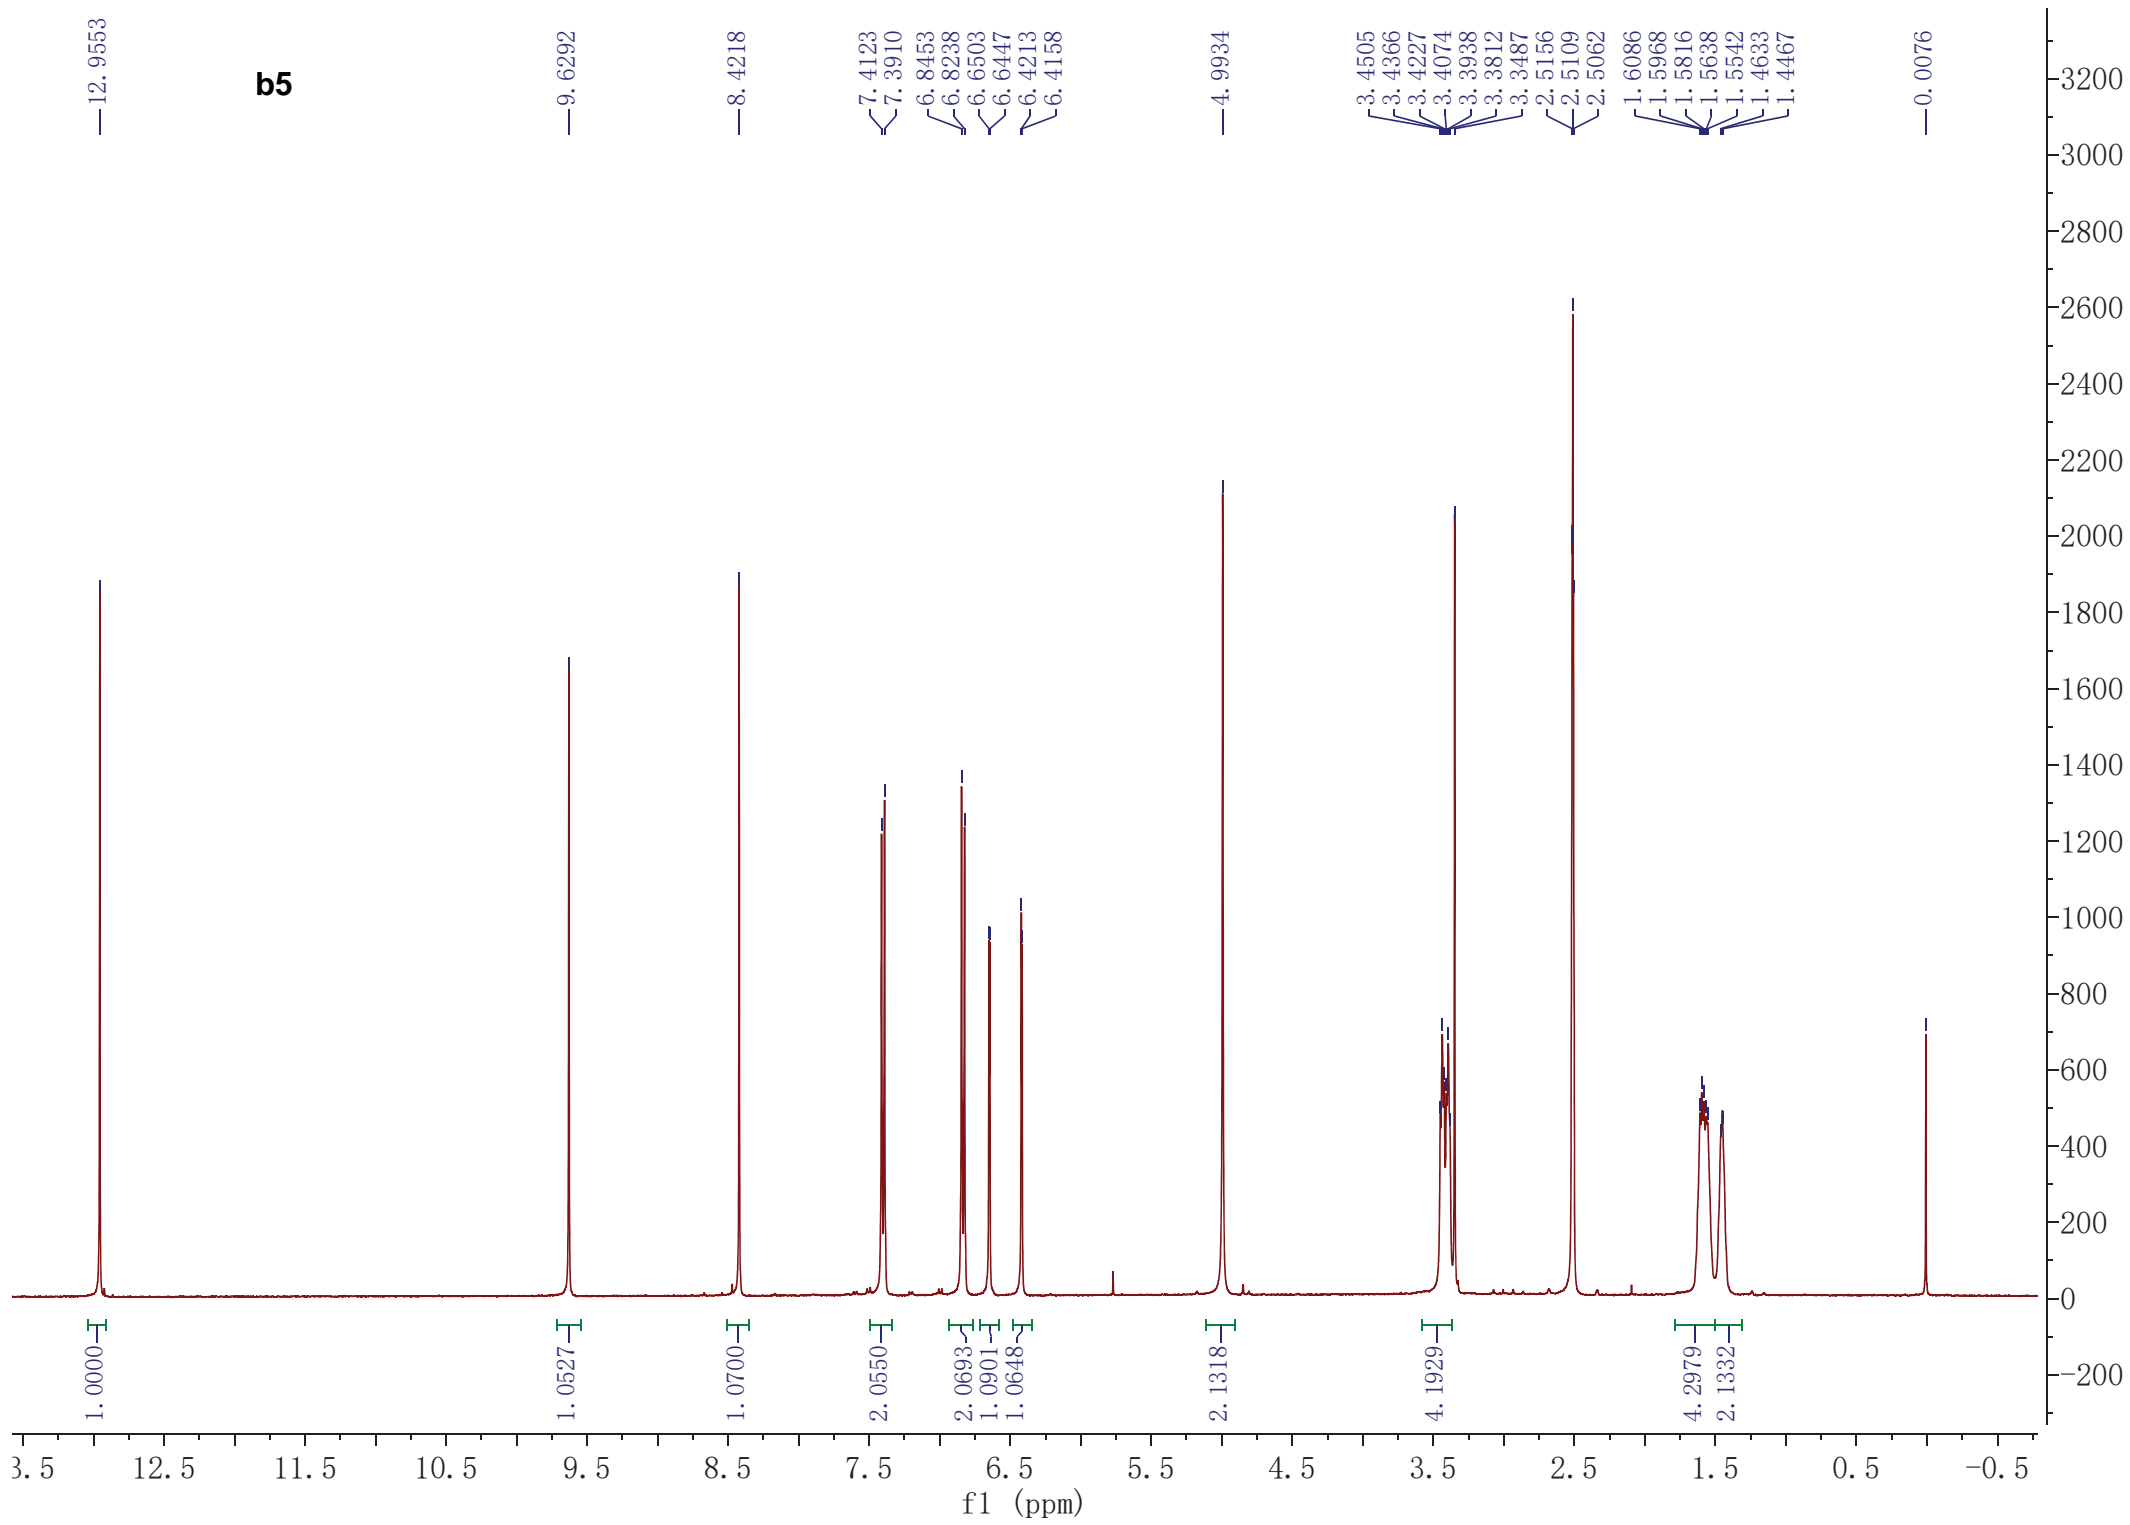

**b6**

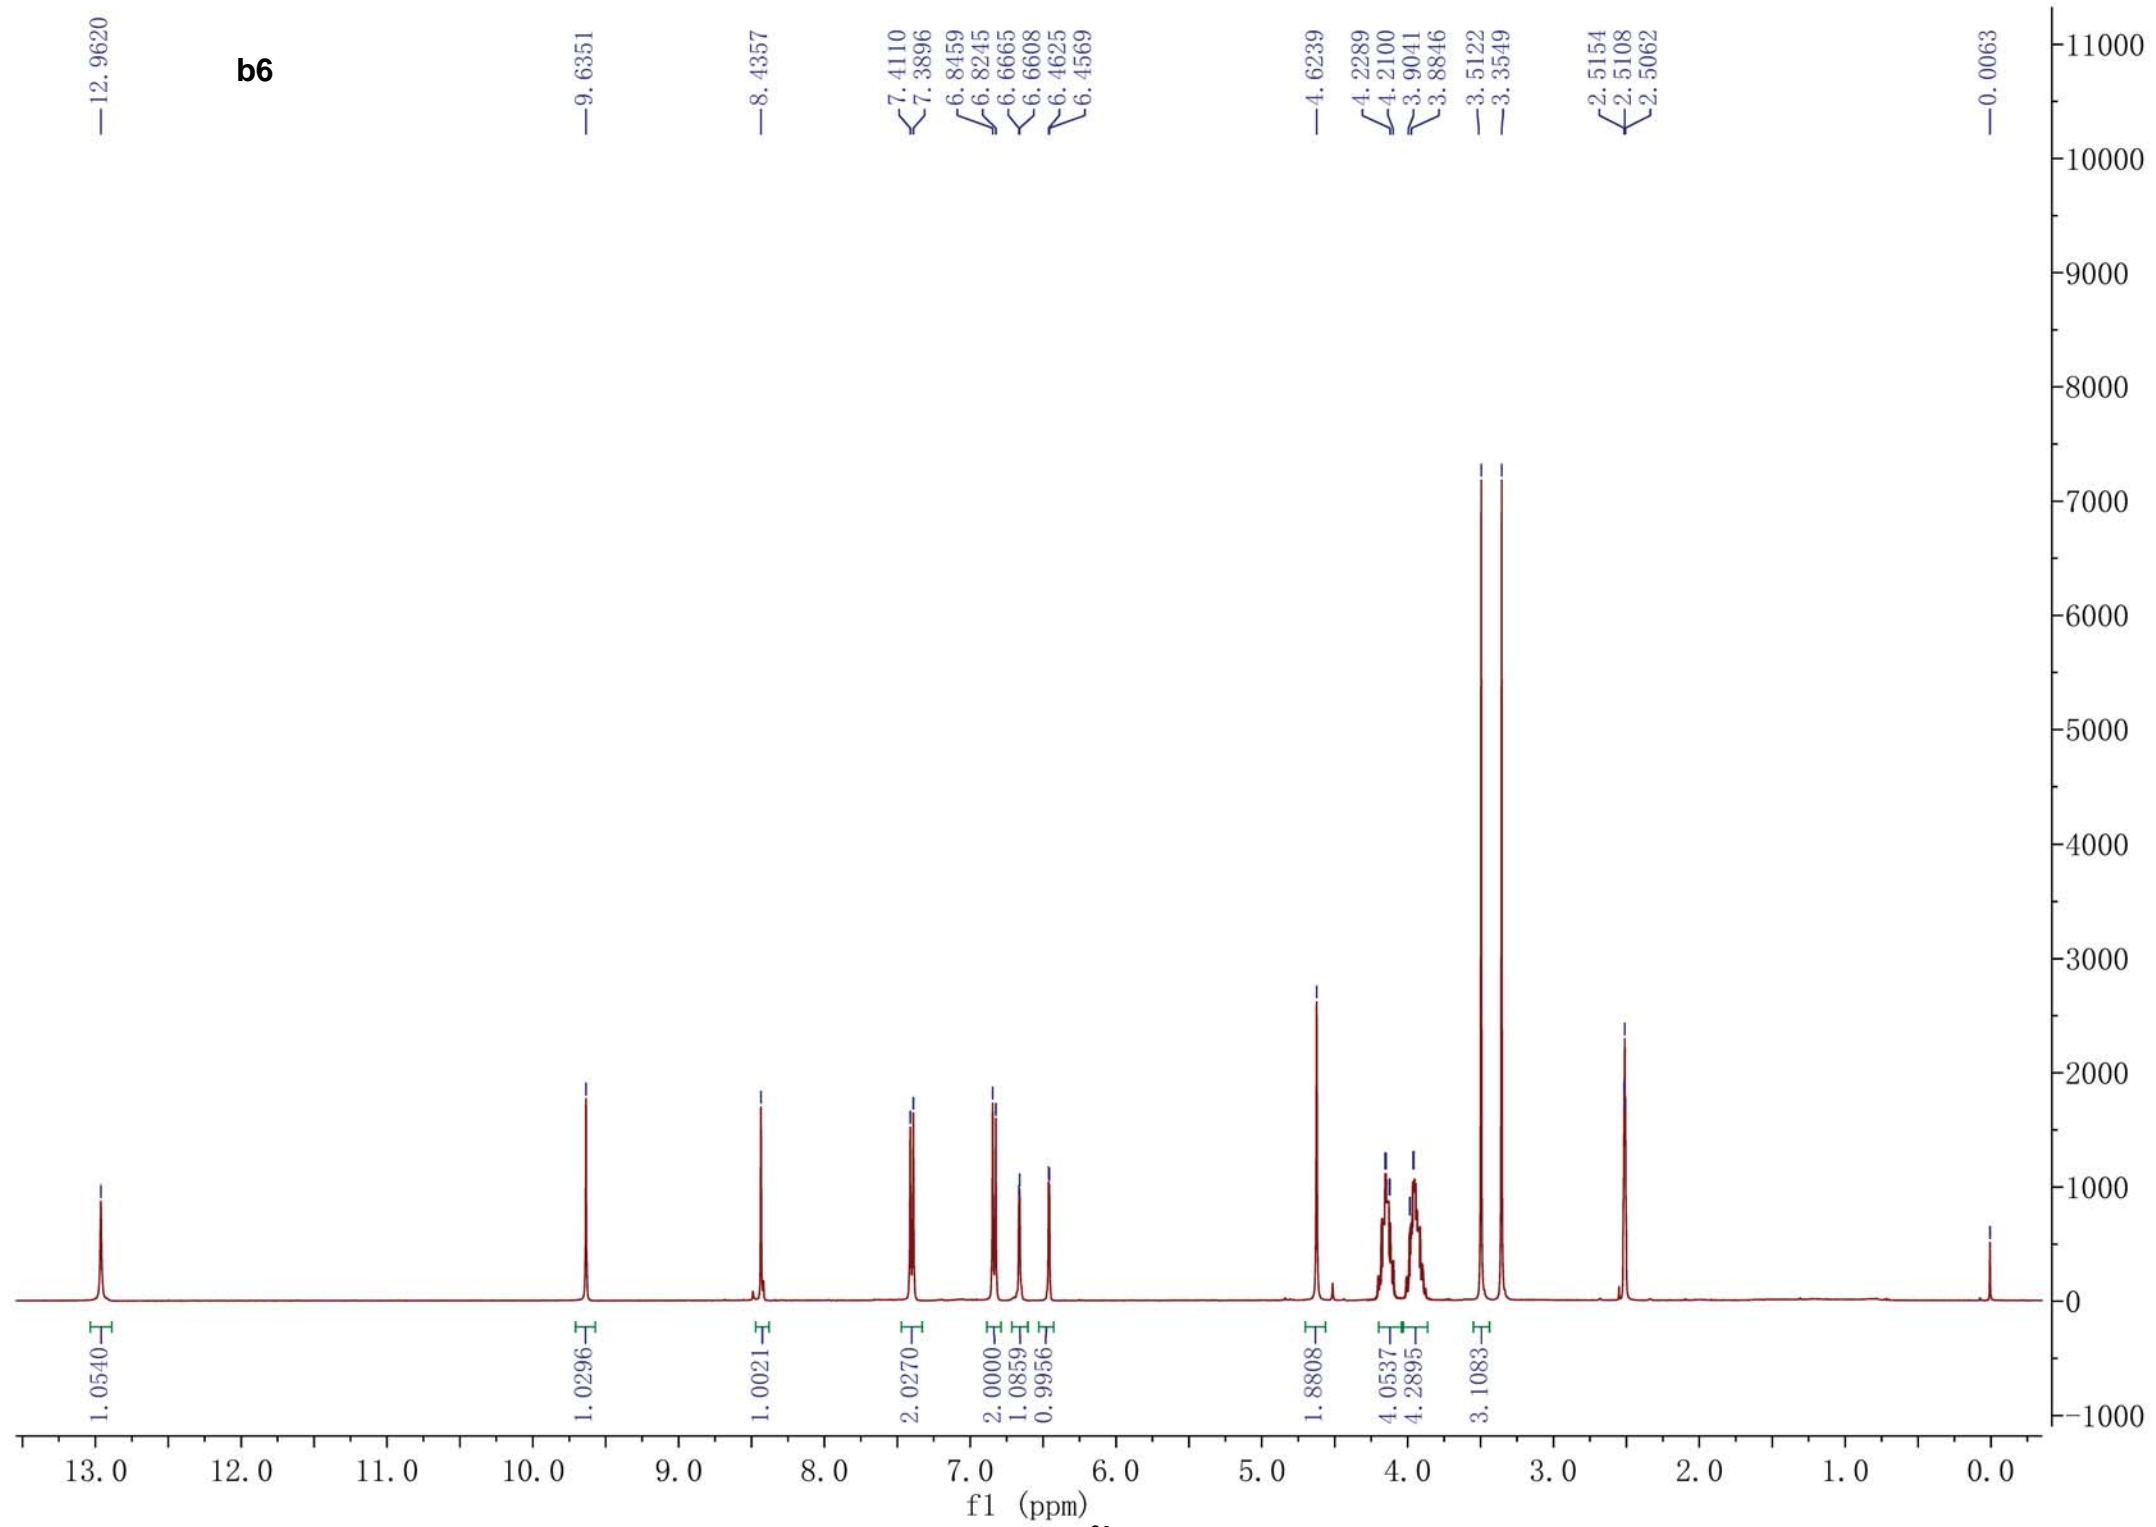

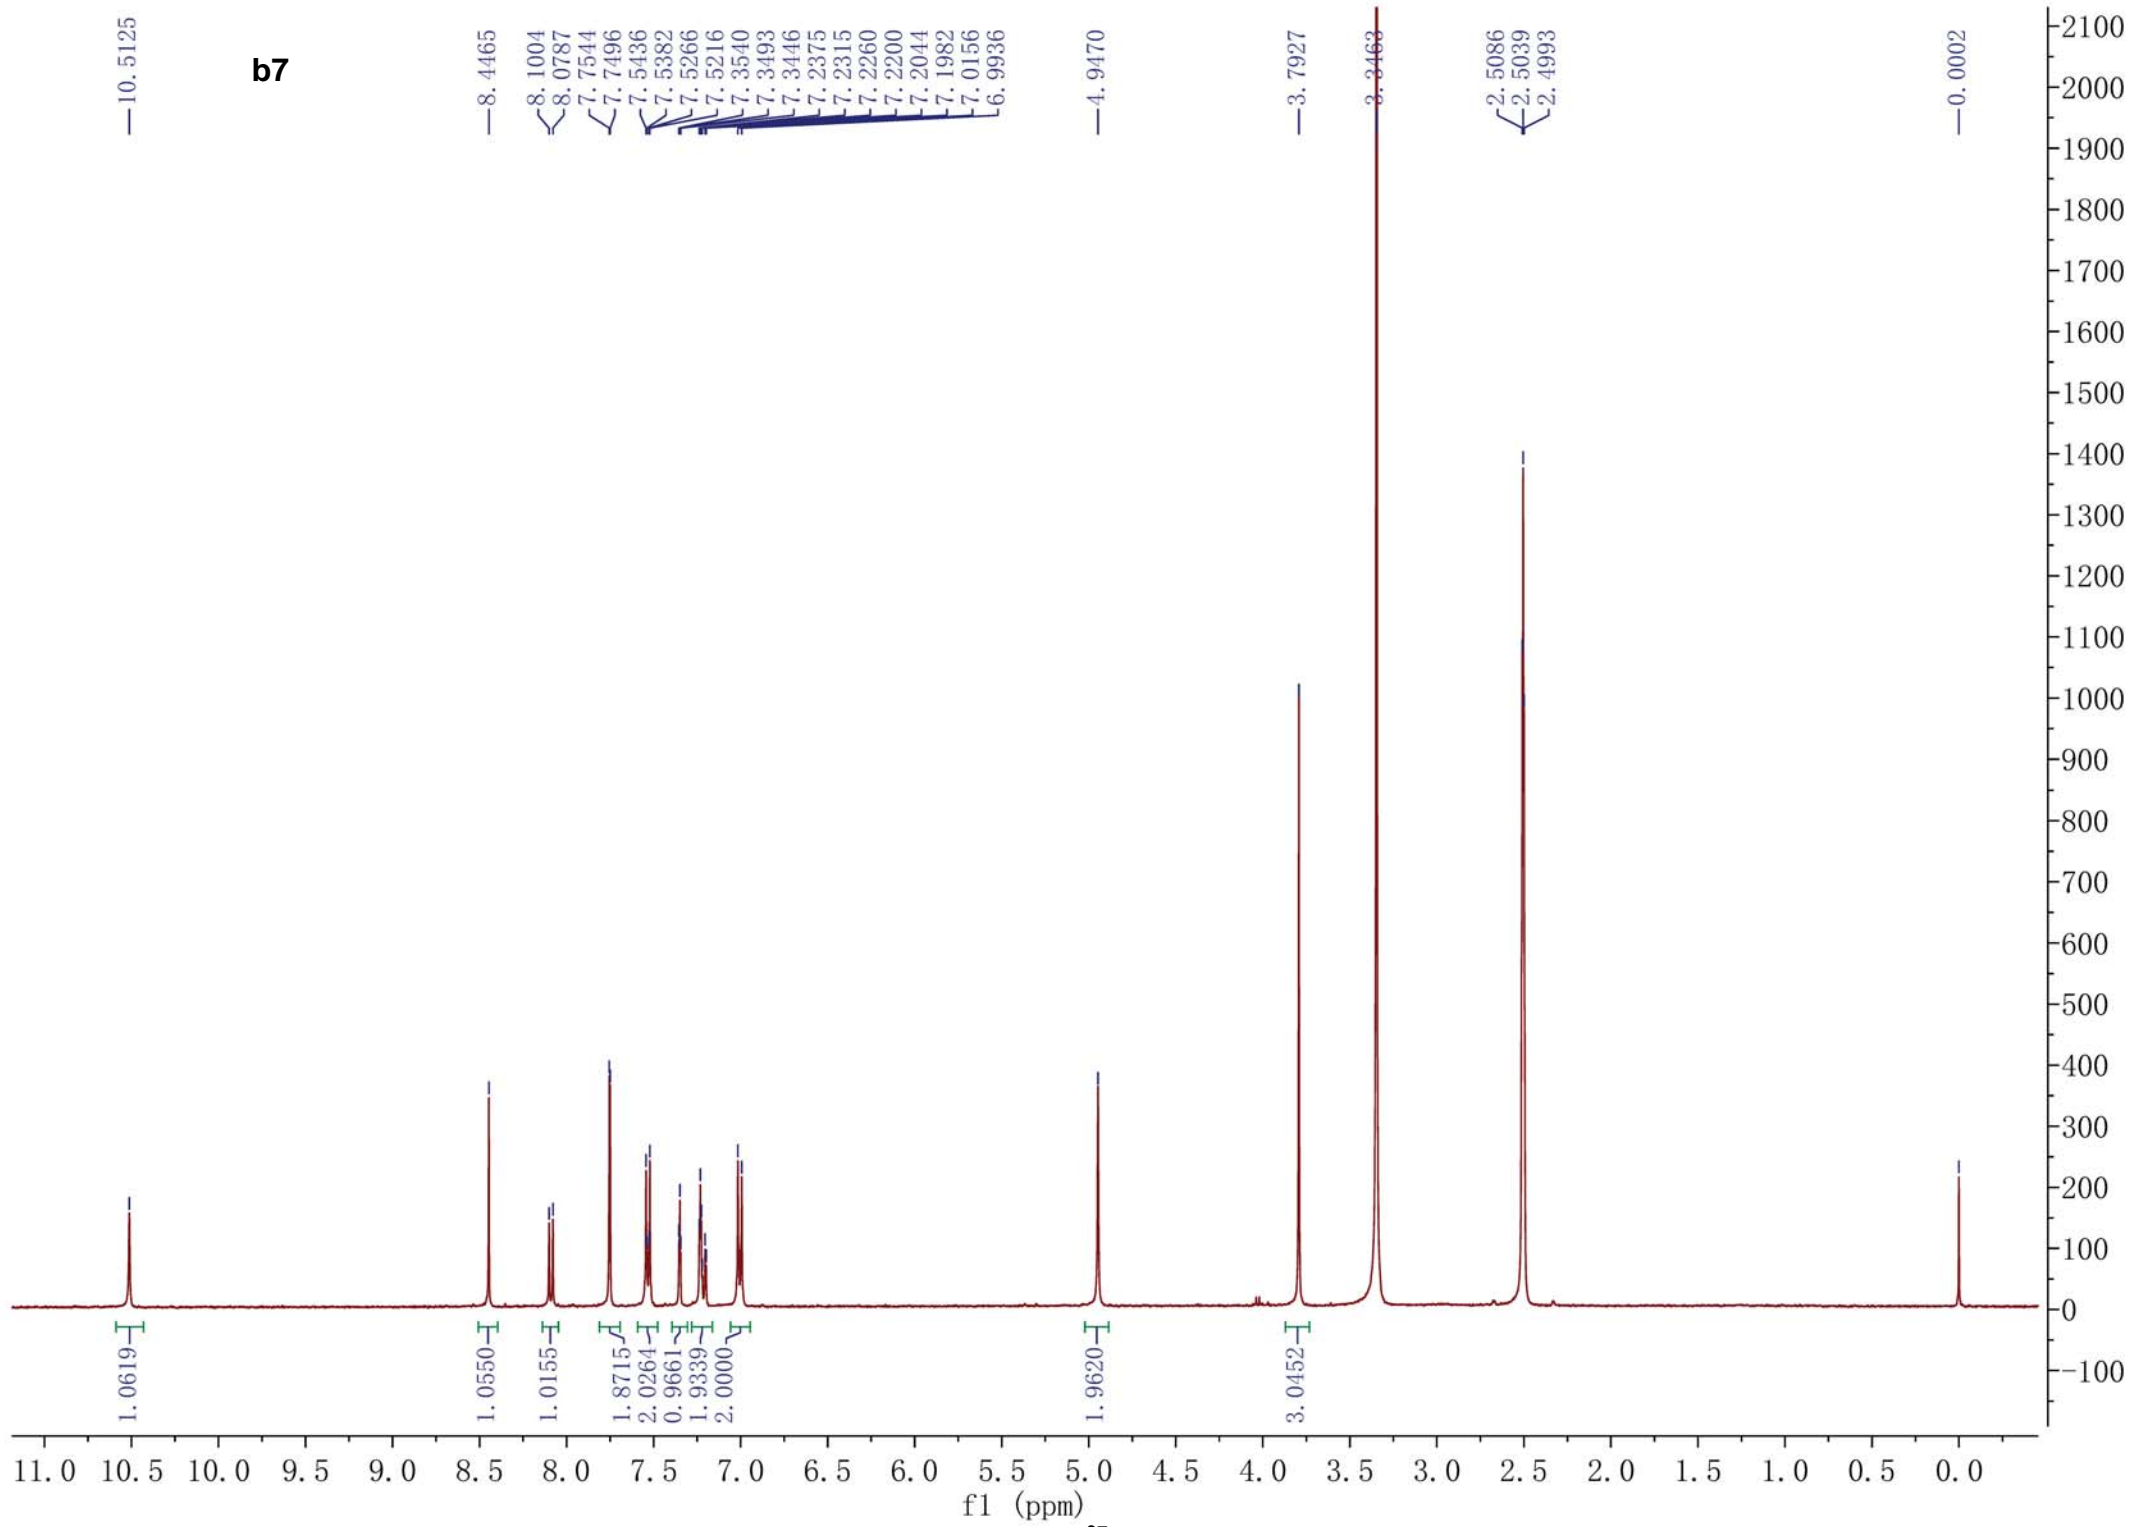

b8

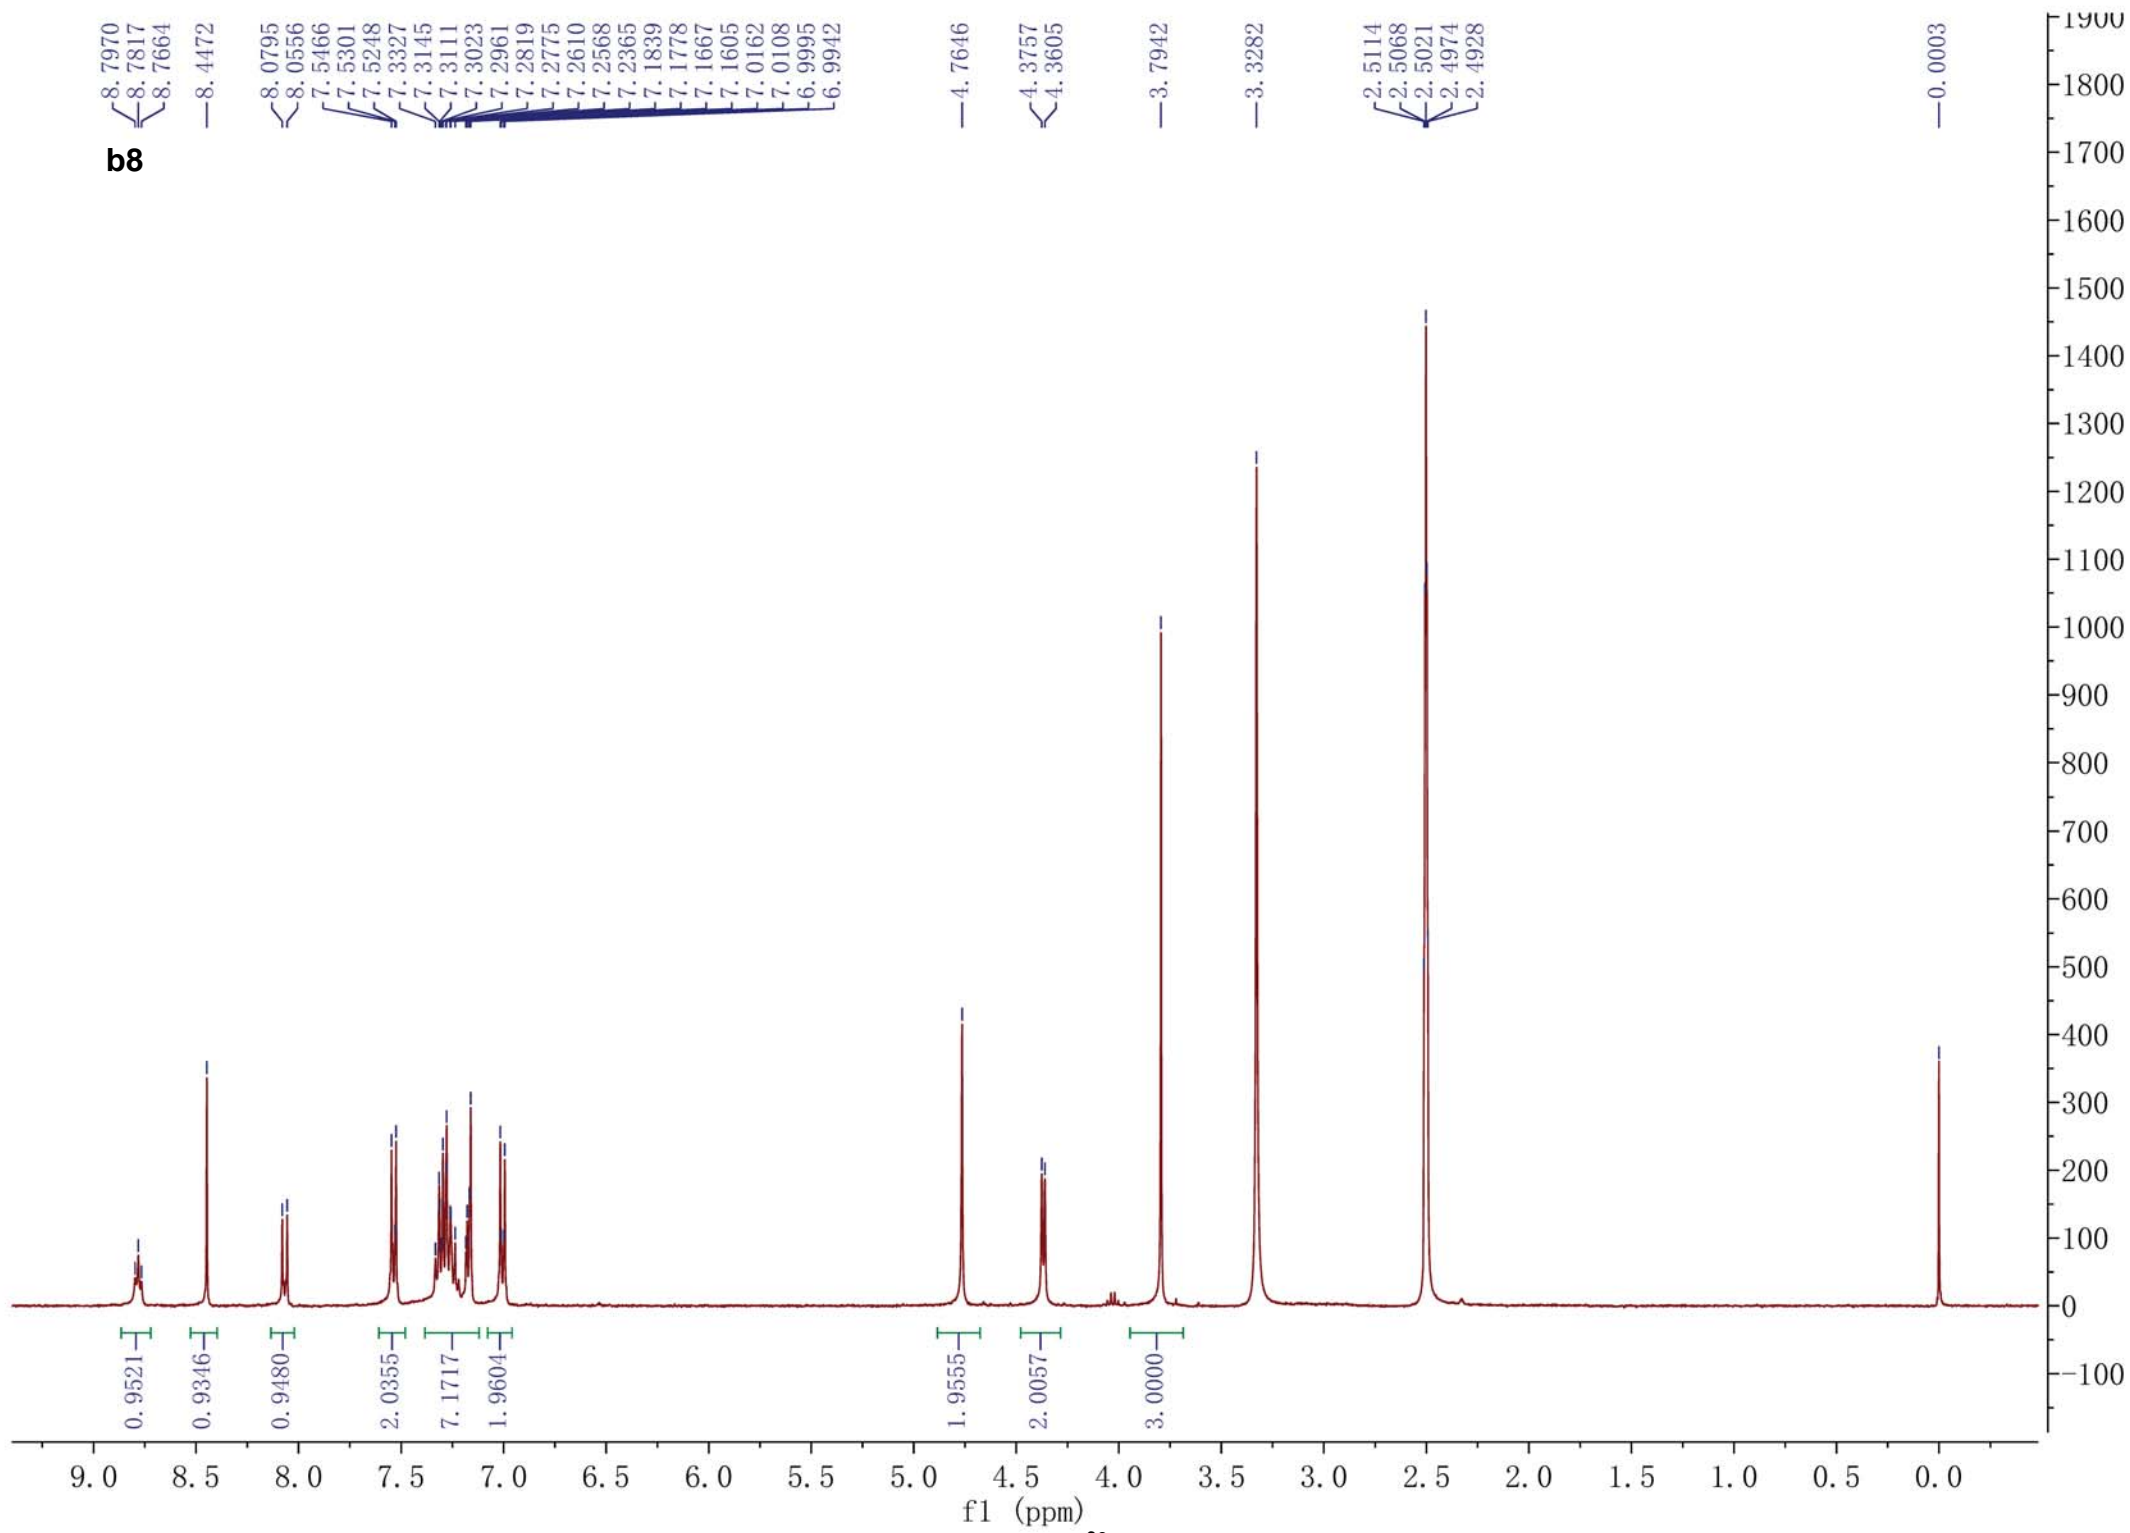



b9

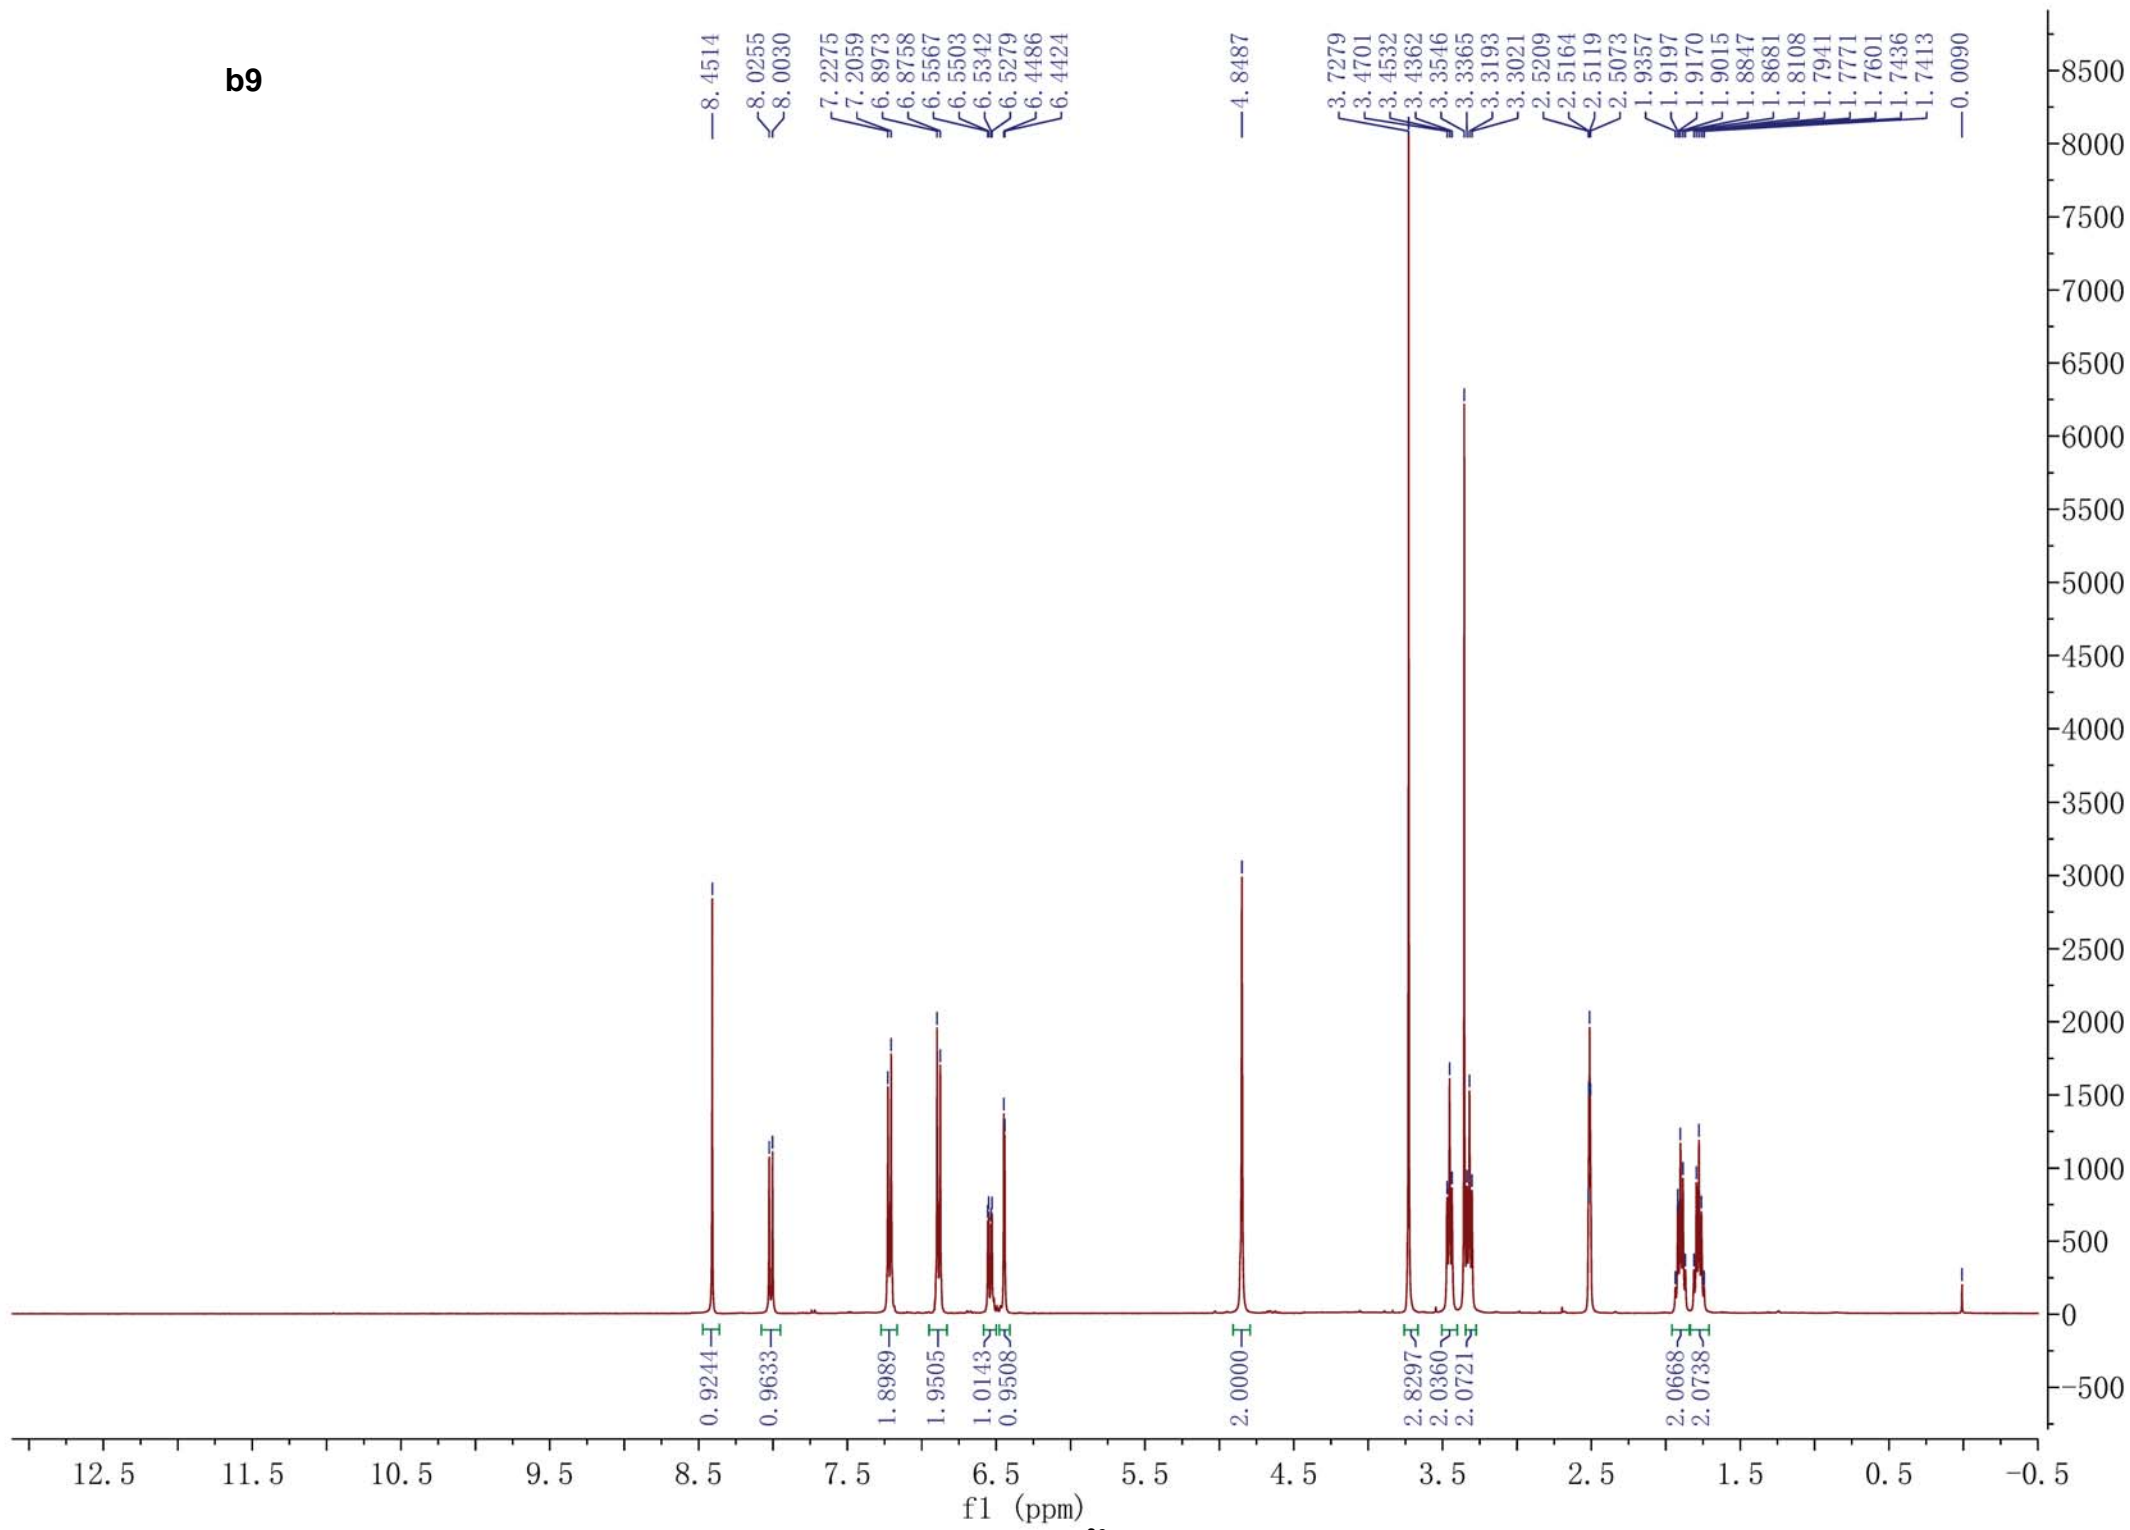

**b10**

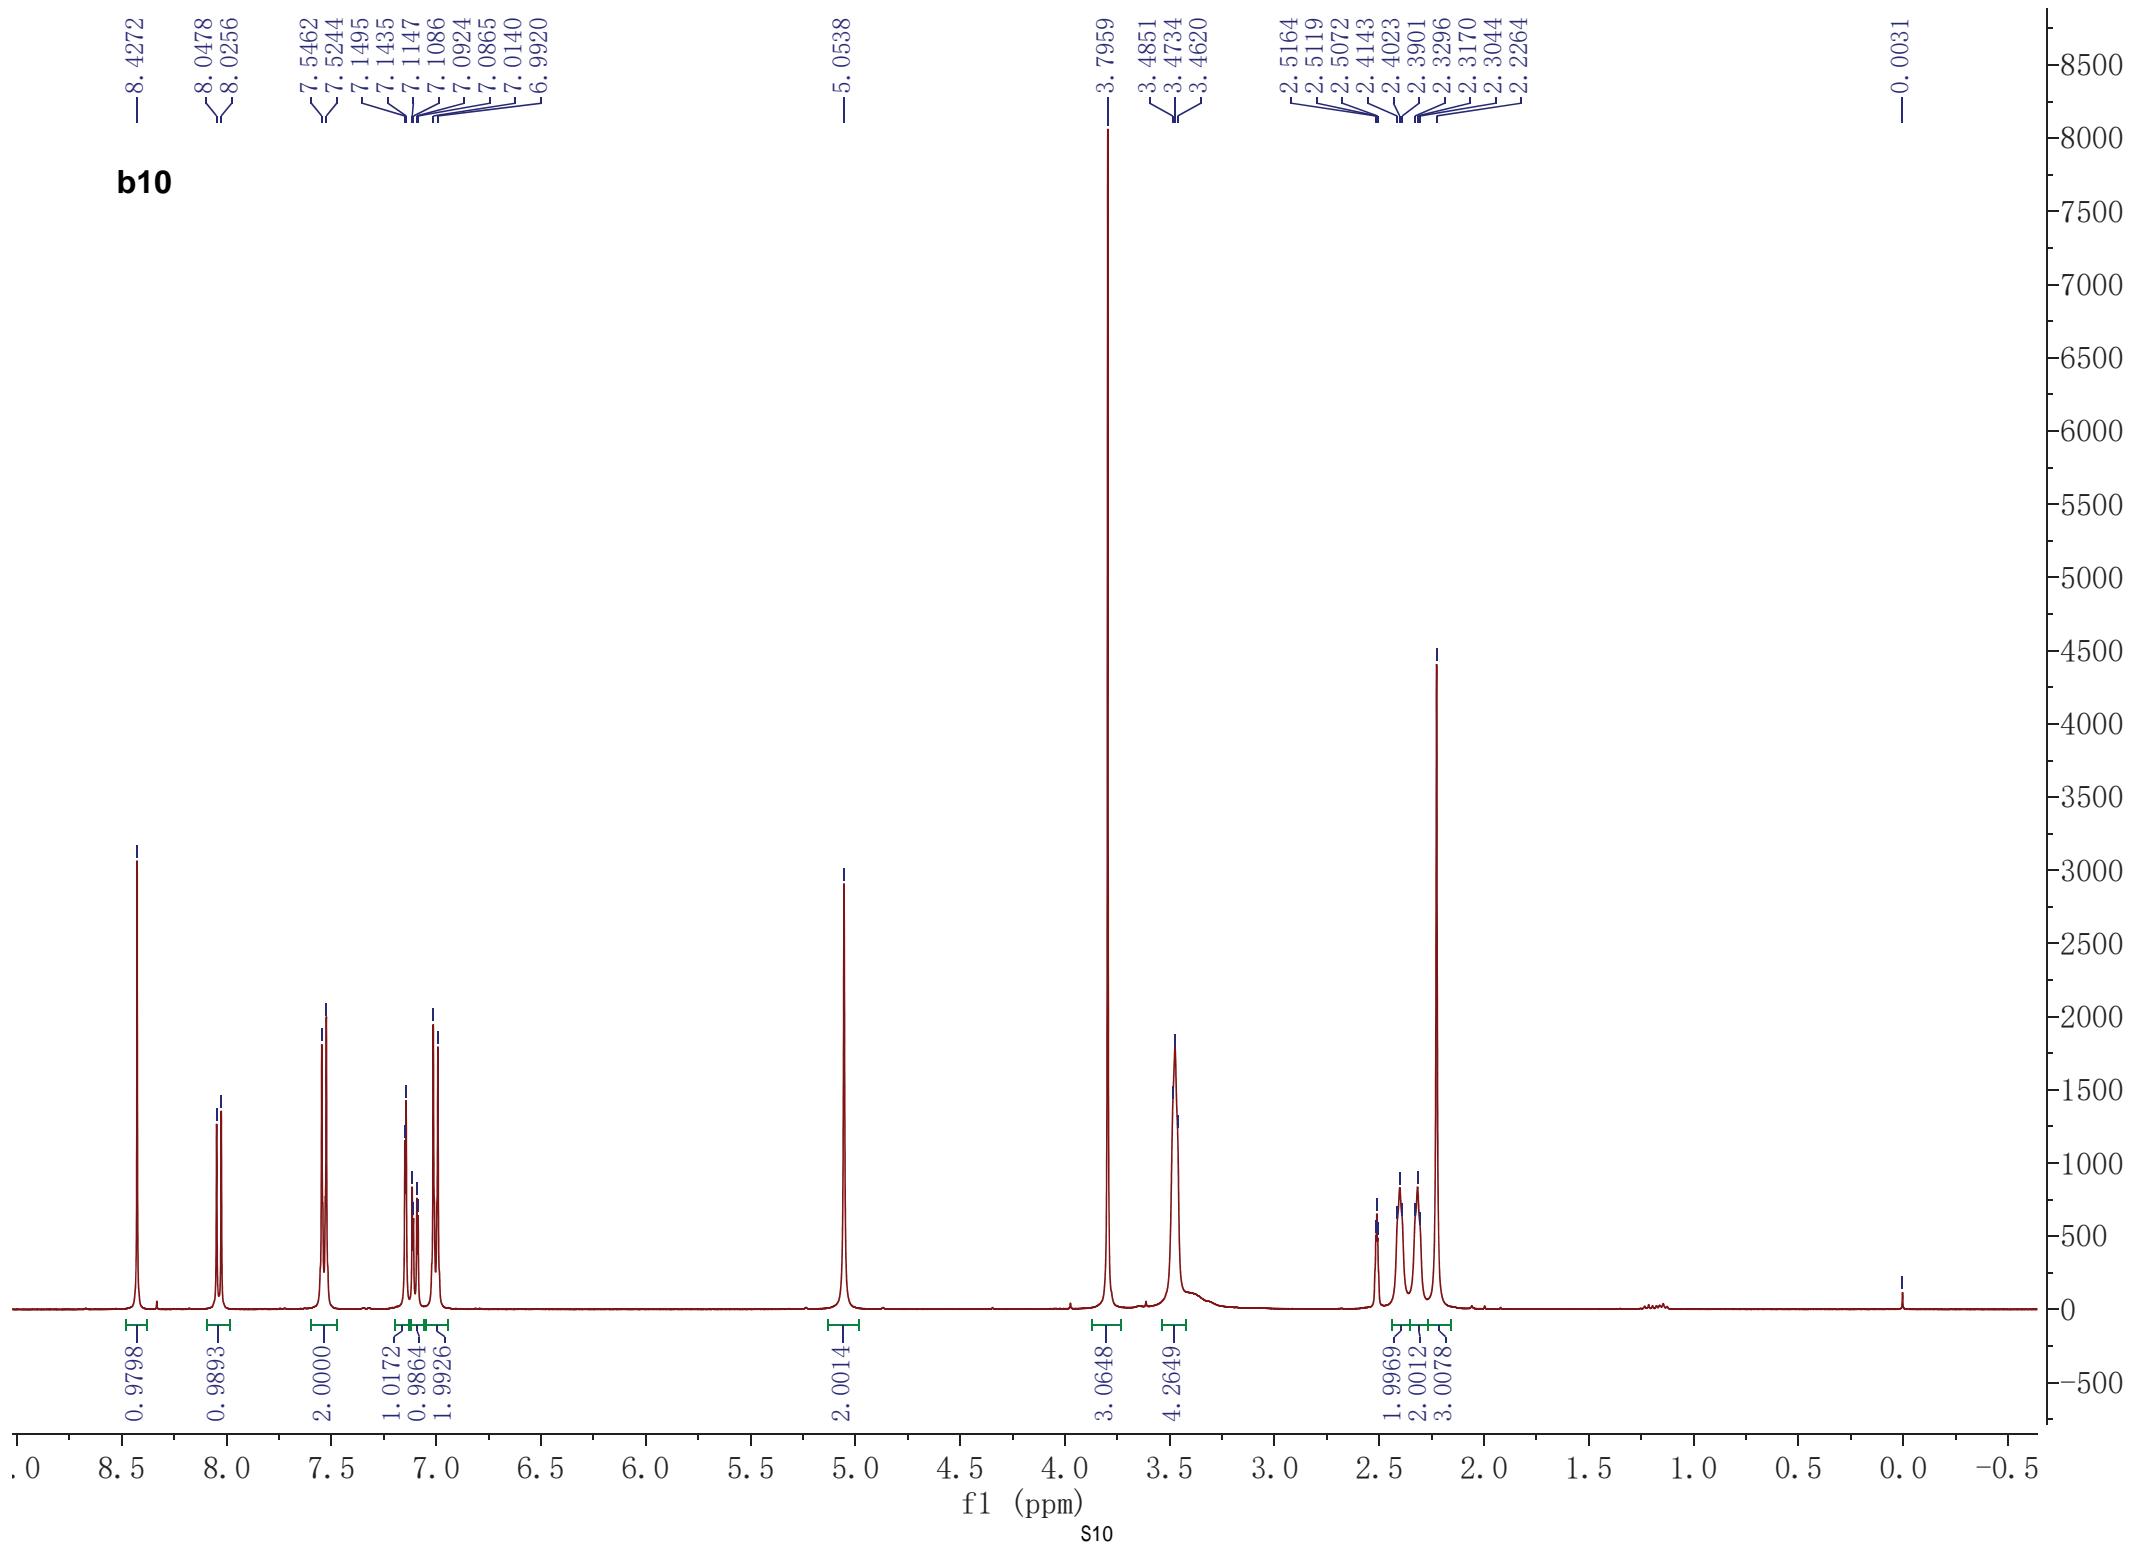

**b10**

- 130.5292
- ~ 127.3046
- ~ 124.5110
- ~ 123.7872
- ~ 118.2338
- ~ 115.4942
- ~ 114.0689
- 102.0172
- 66.5627
- ~ 55.6082
- ~ 54.9447
- 46.0132
- 44.2593
- 40.5994
- ~ 40.3893
- ~ 40.1811
- ~ 39.9725
- ~ 39.7647
- ~ 39.5566
- ~ 39.3481

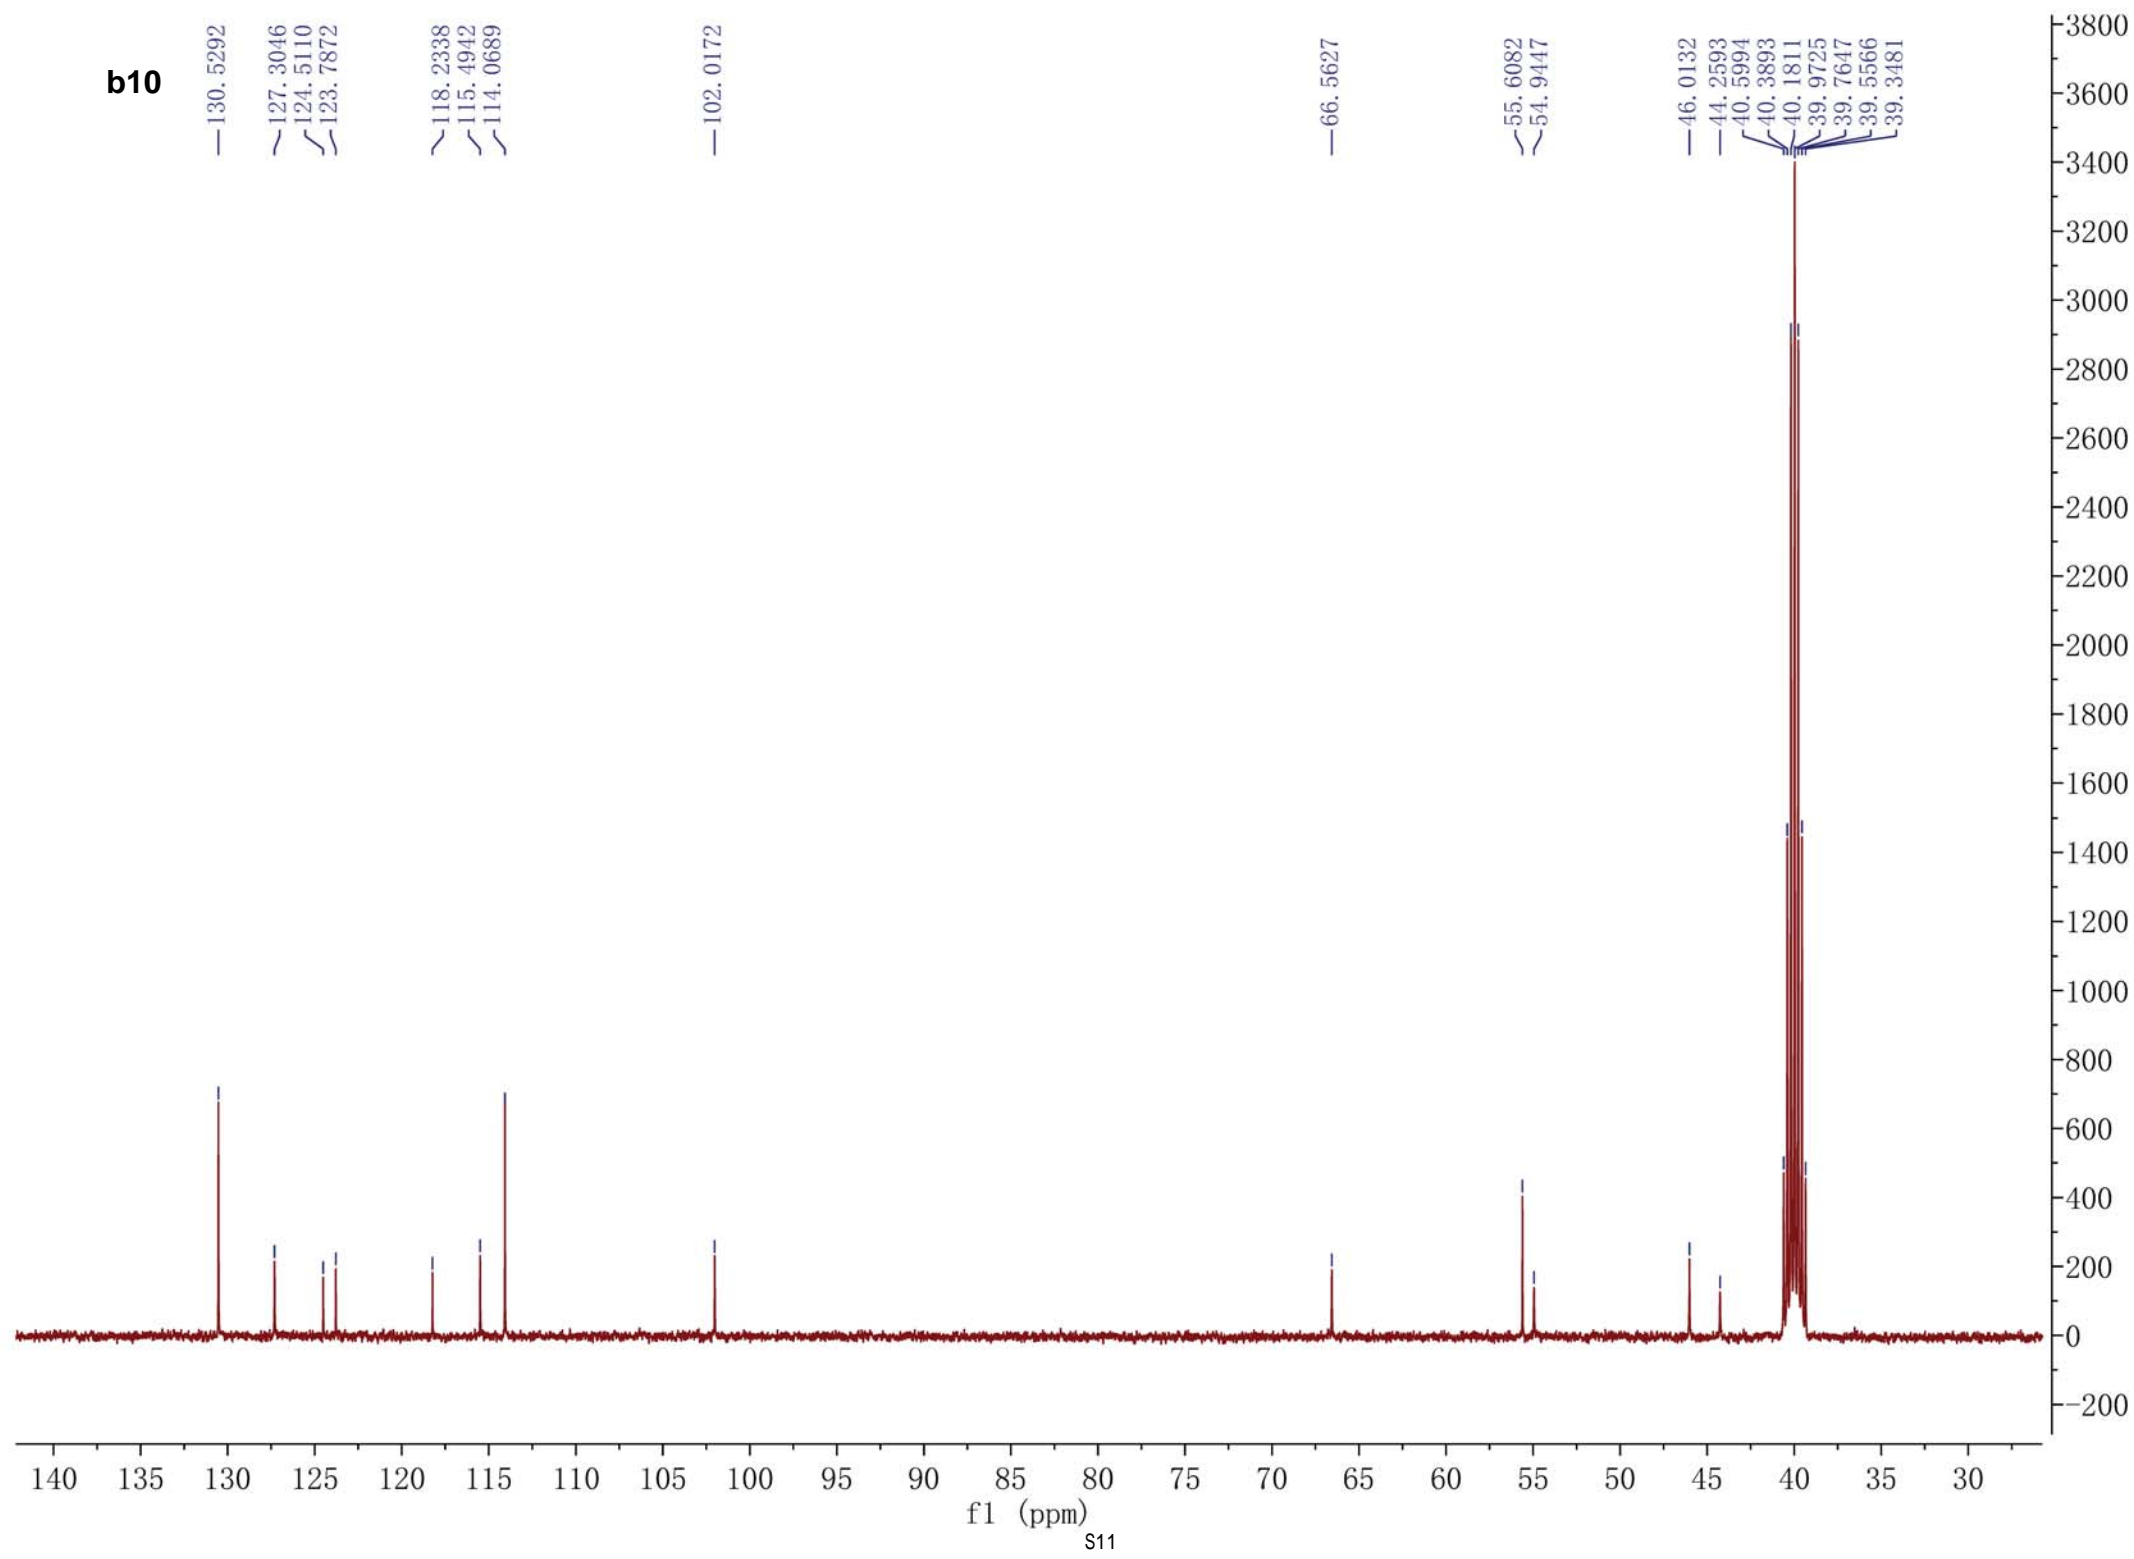

**b11**

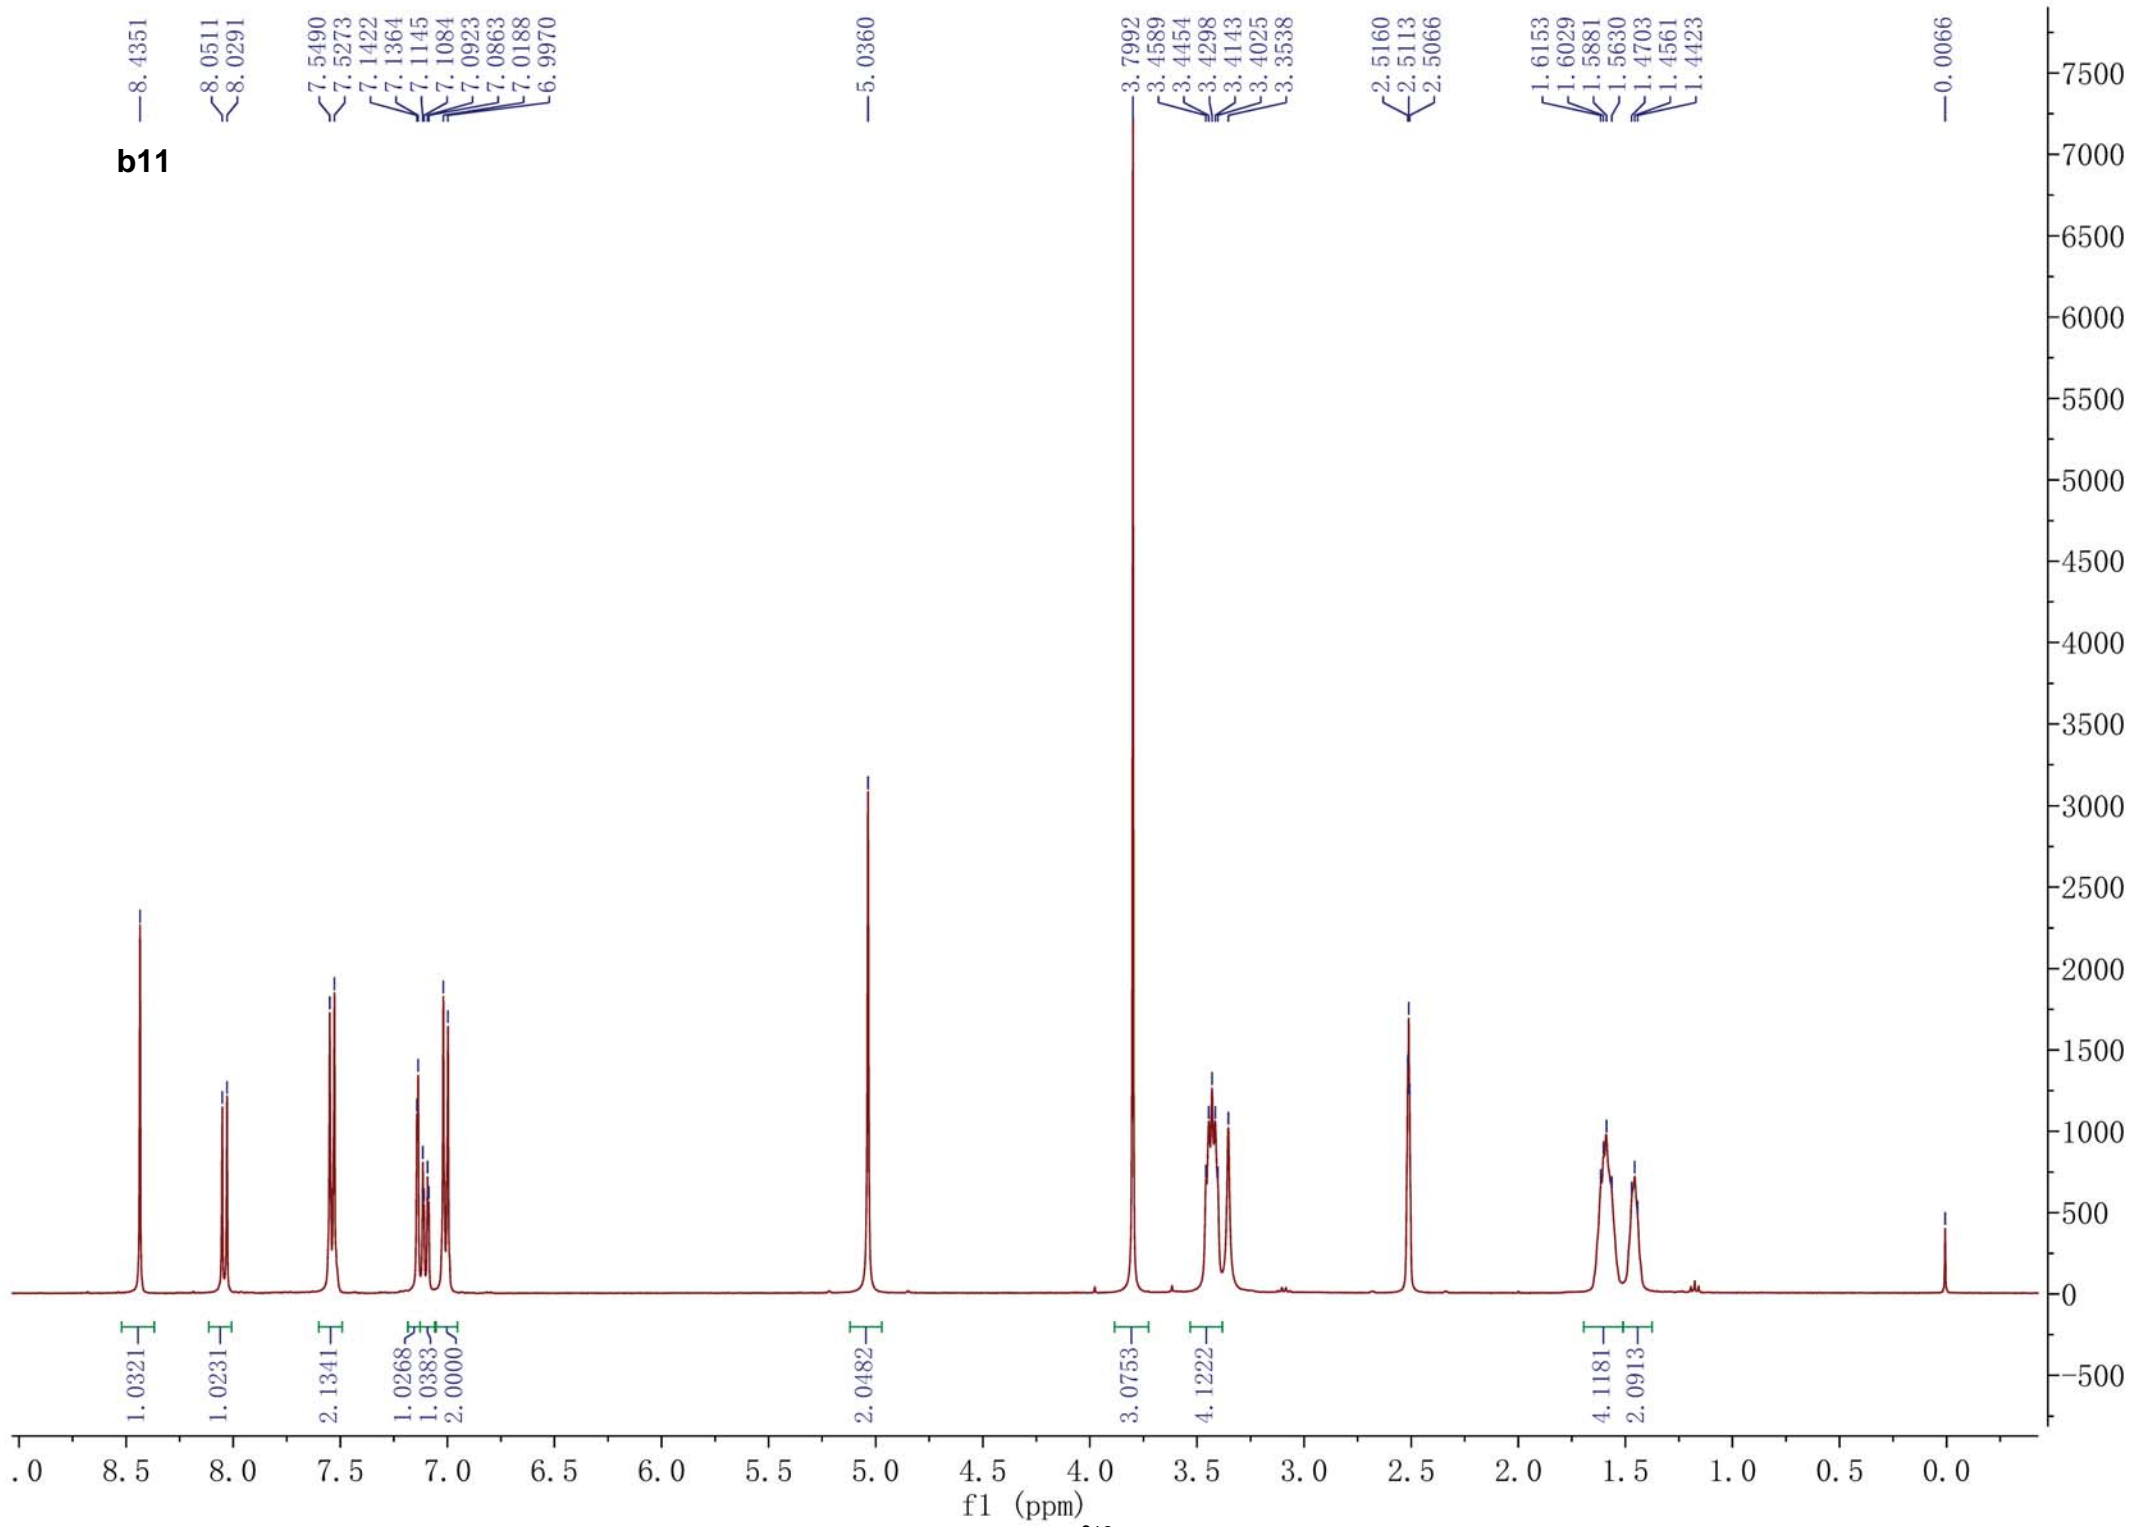

**b12**

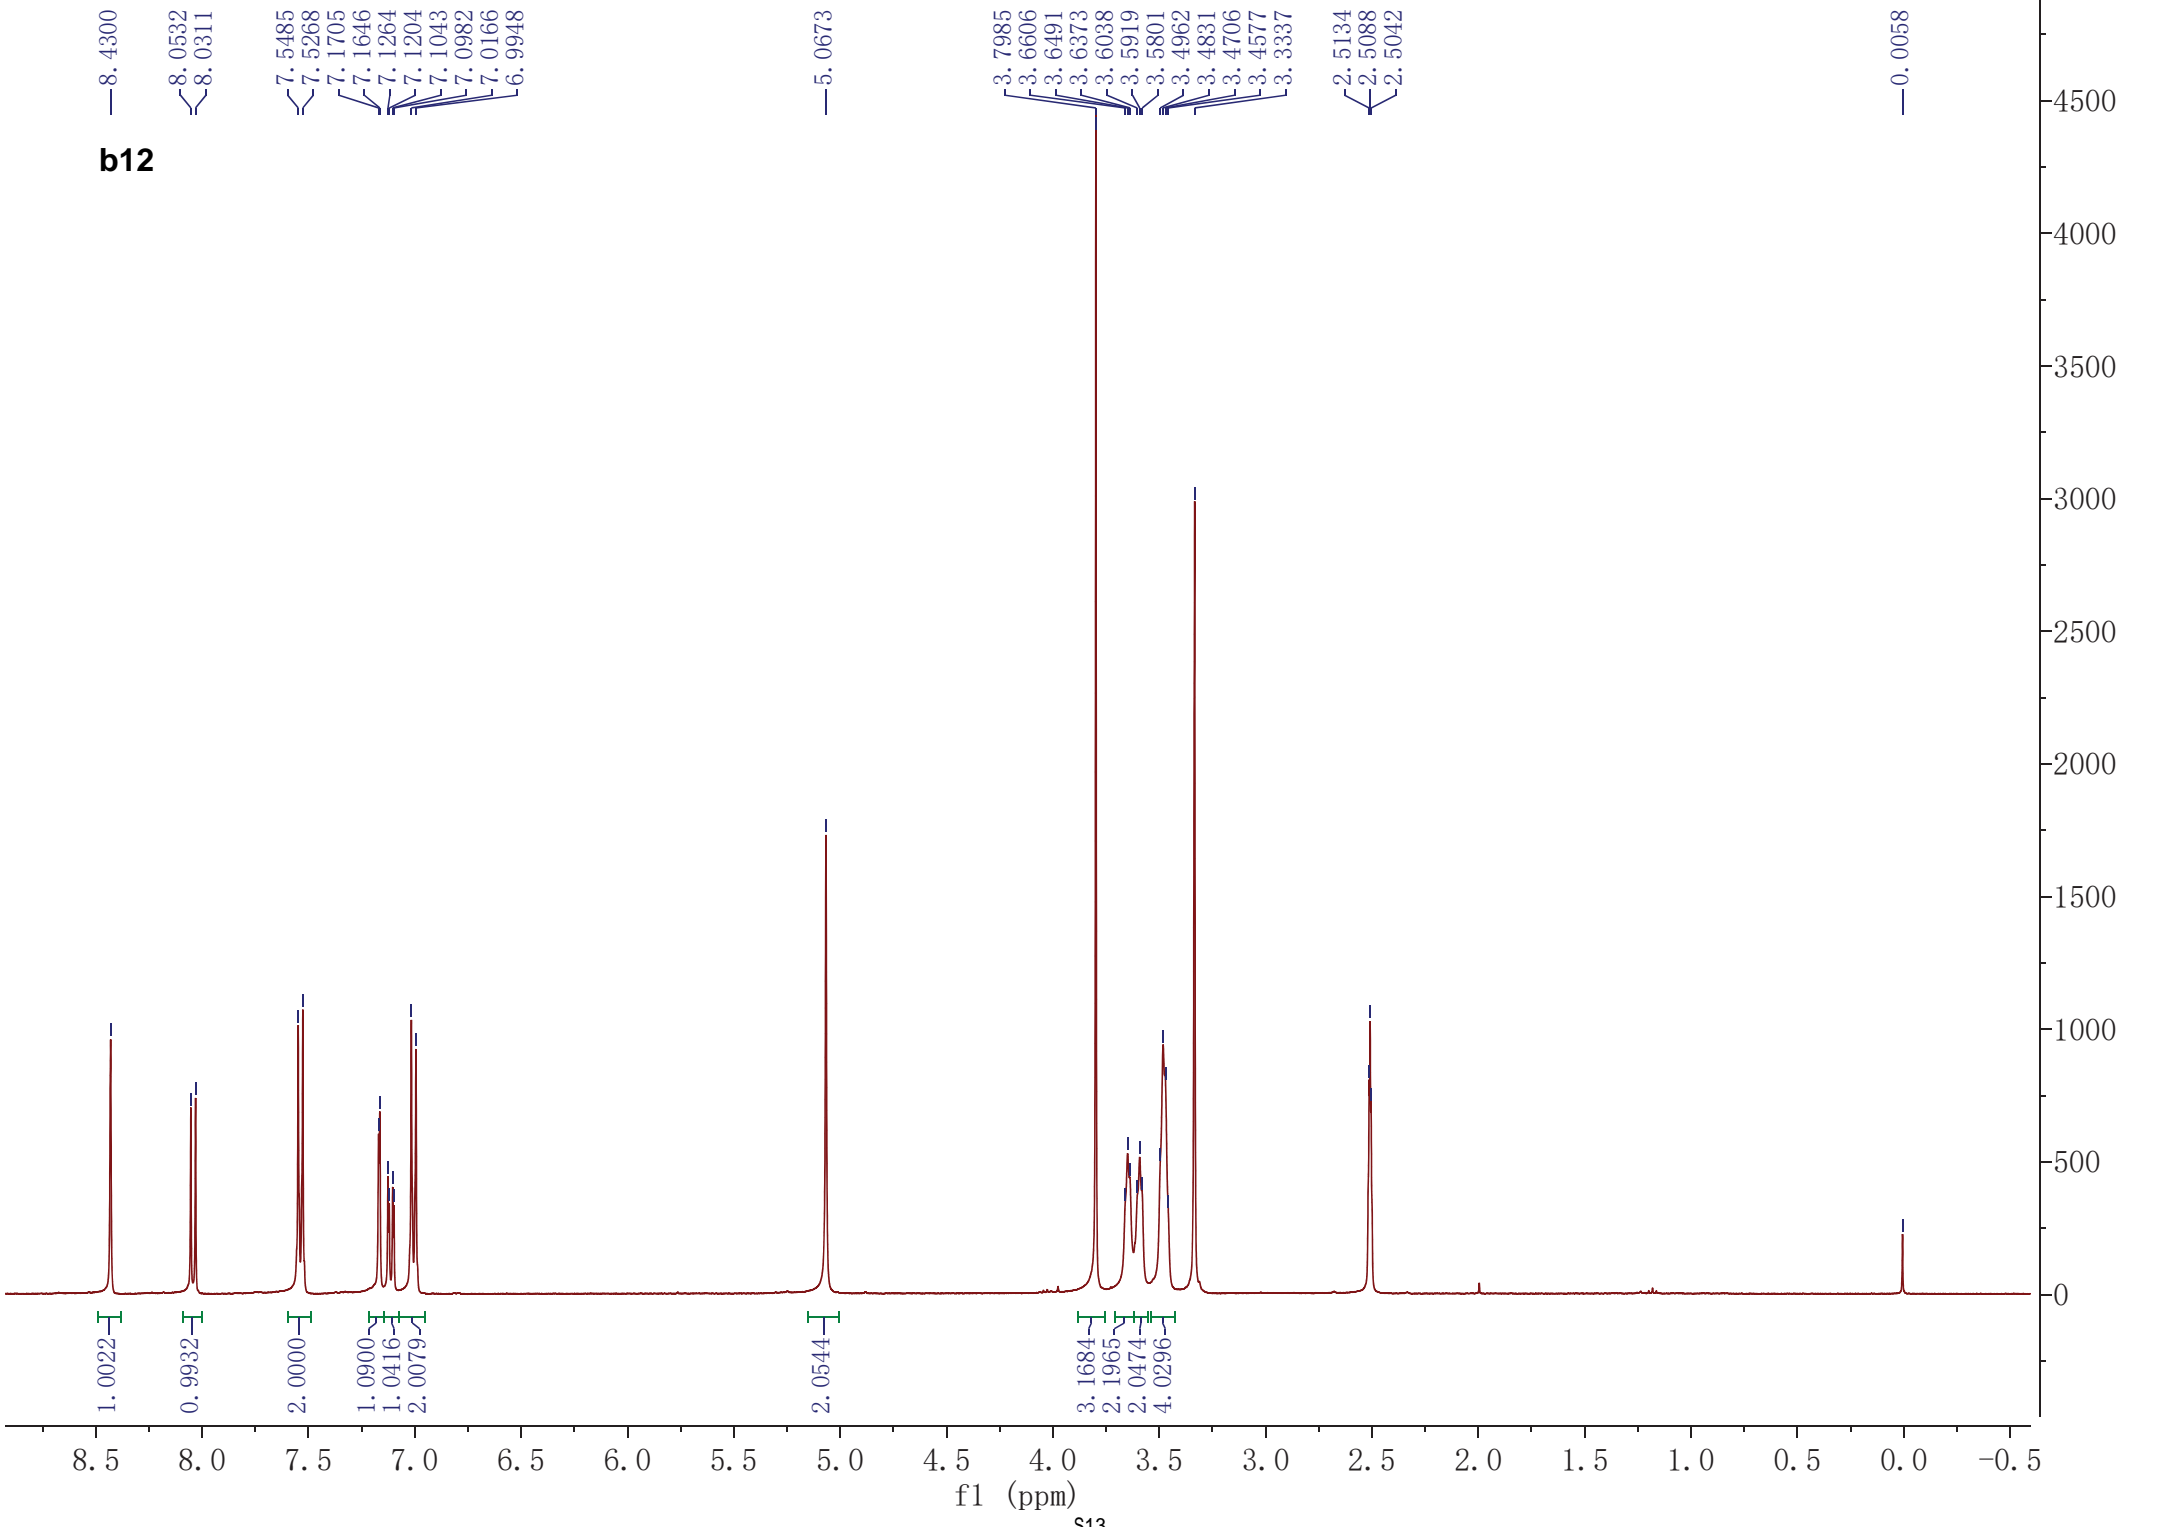

**b13**

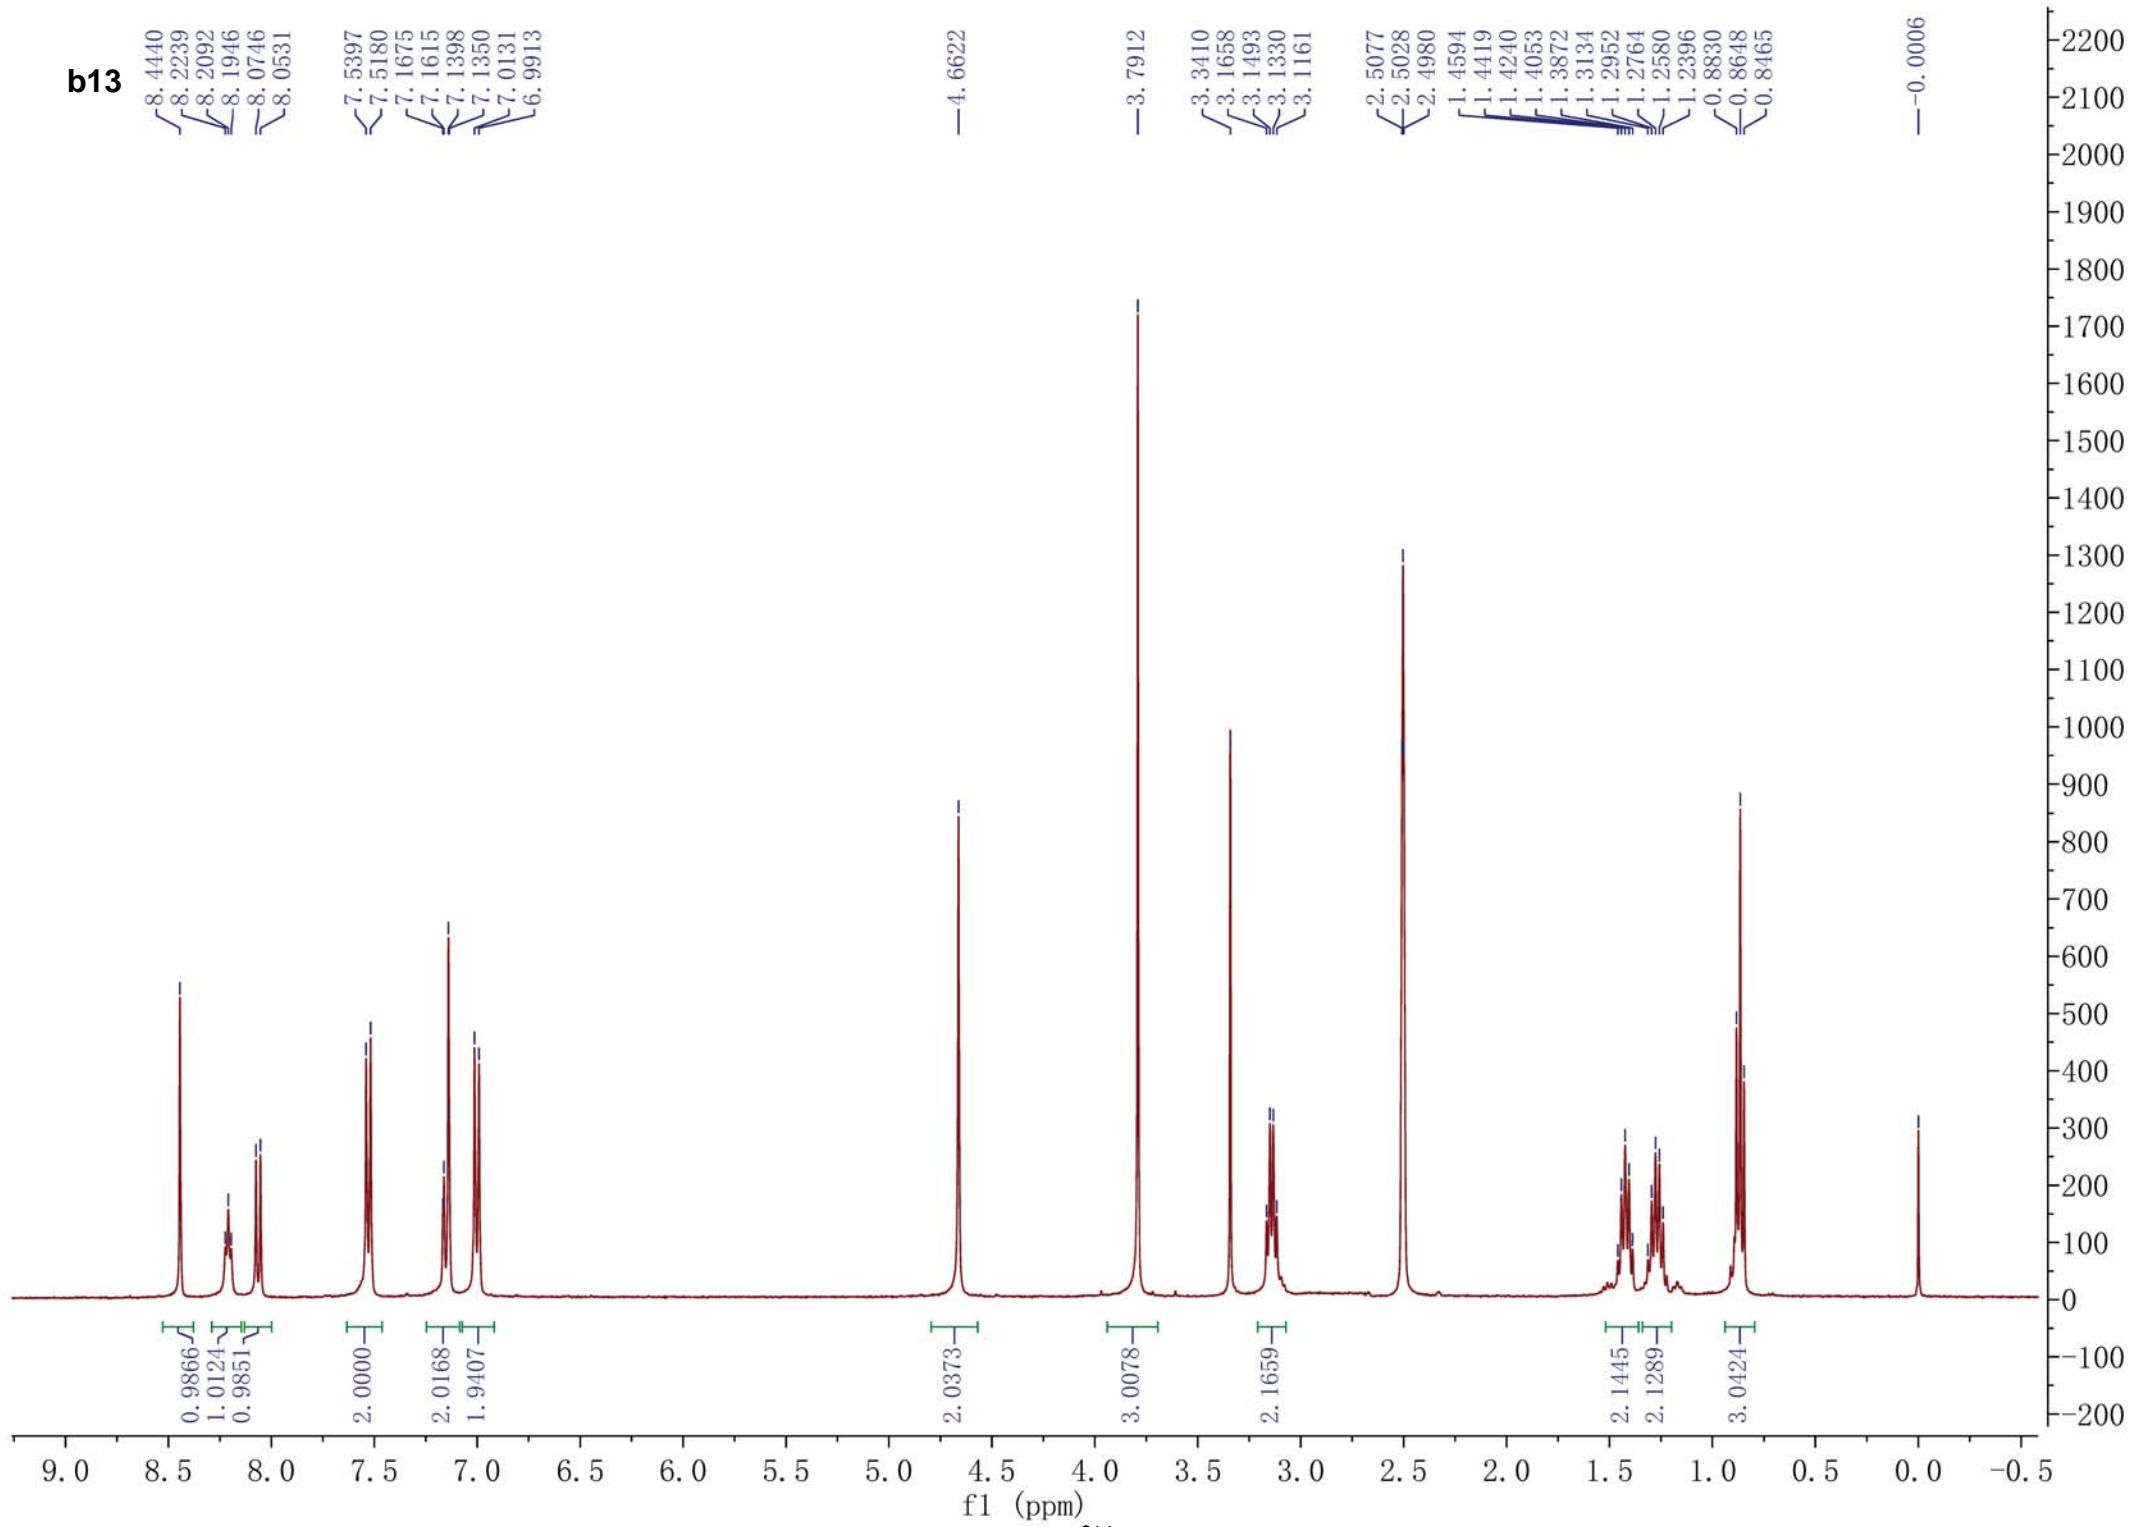

**b14**

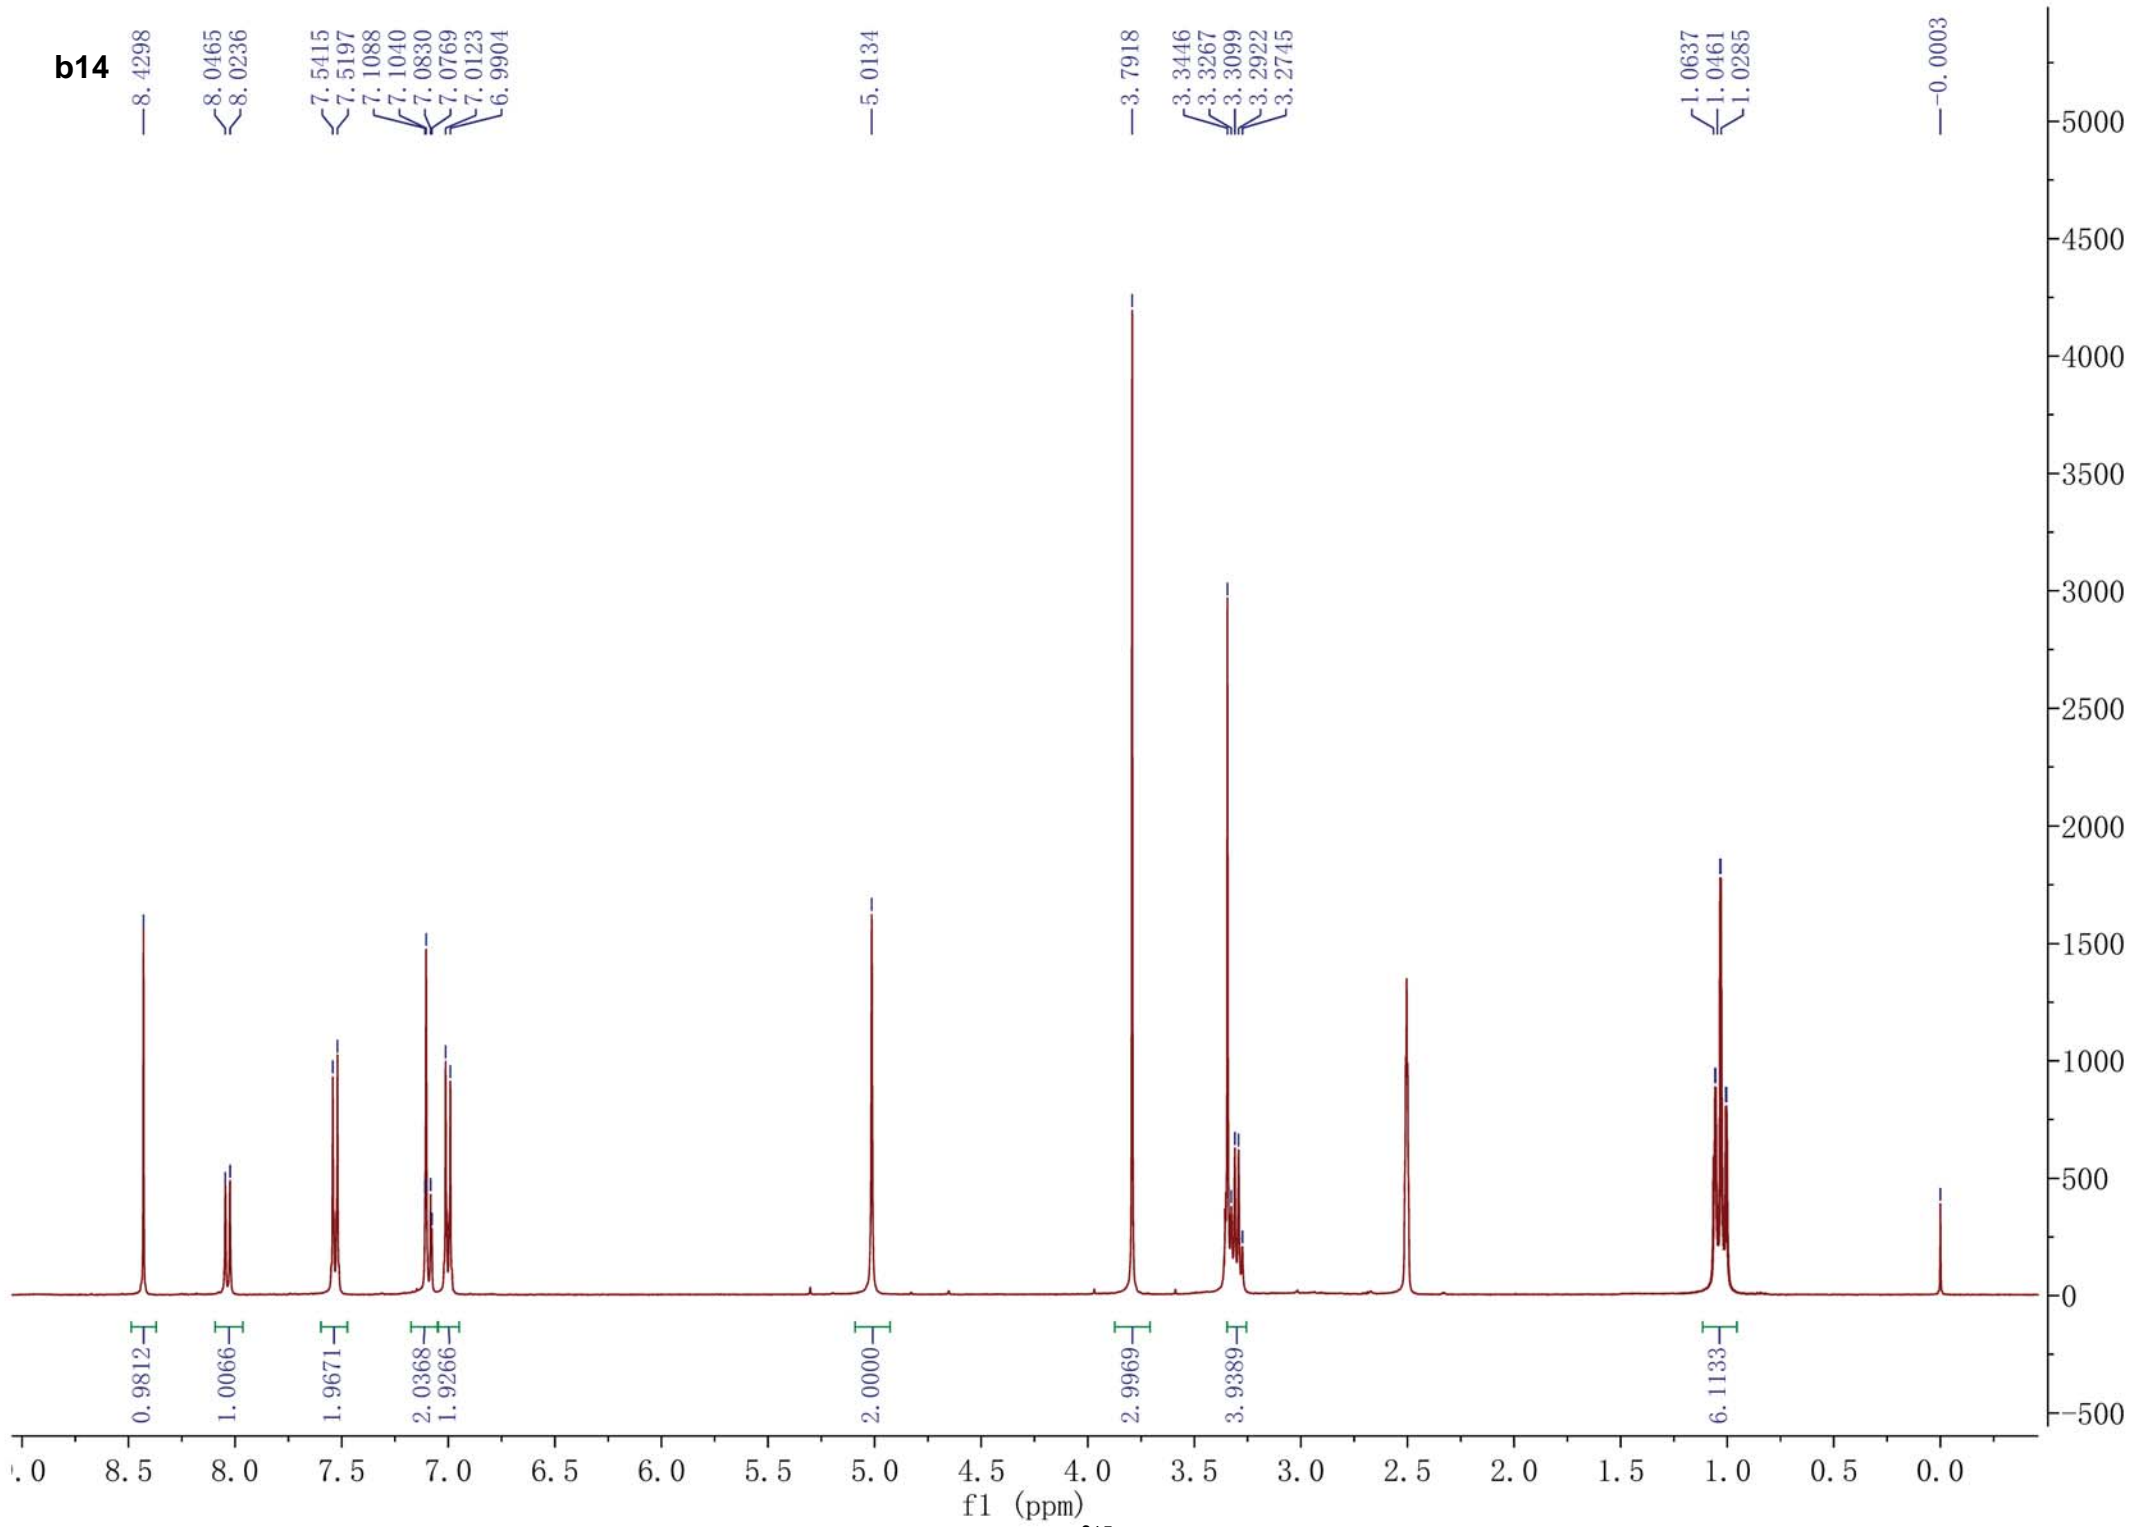

**b15**

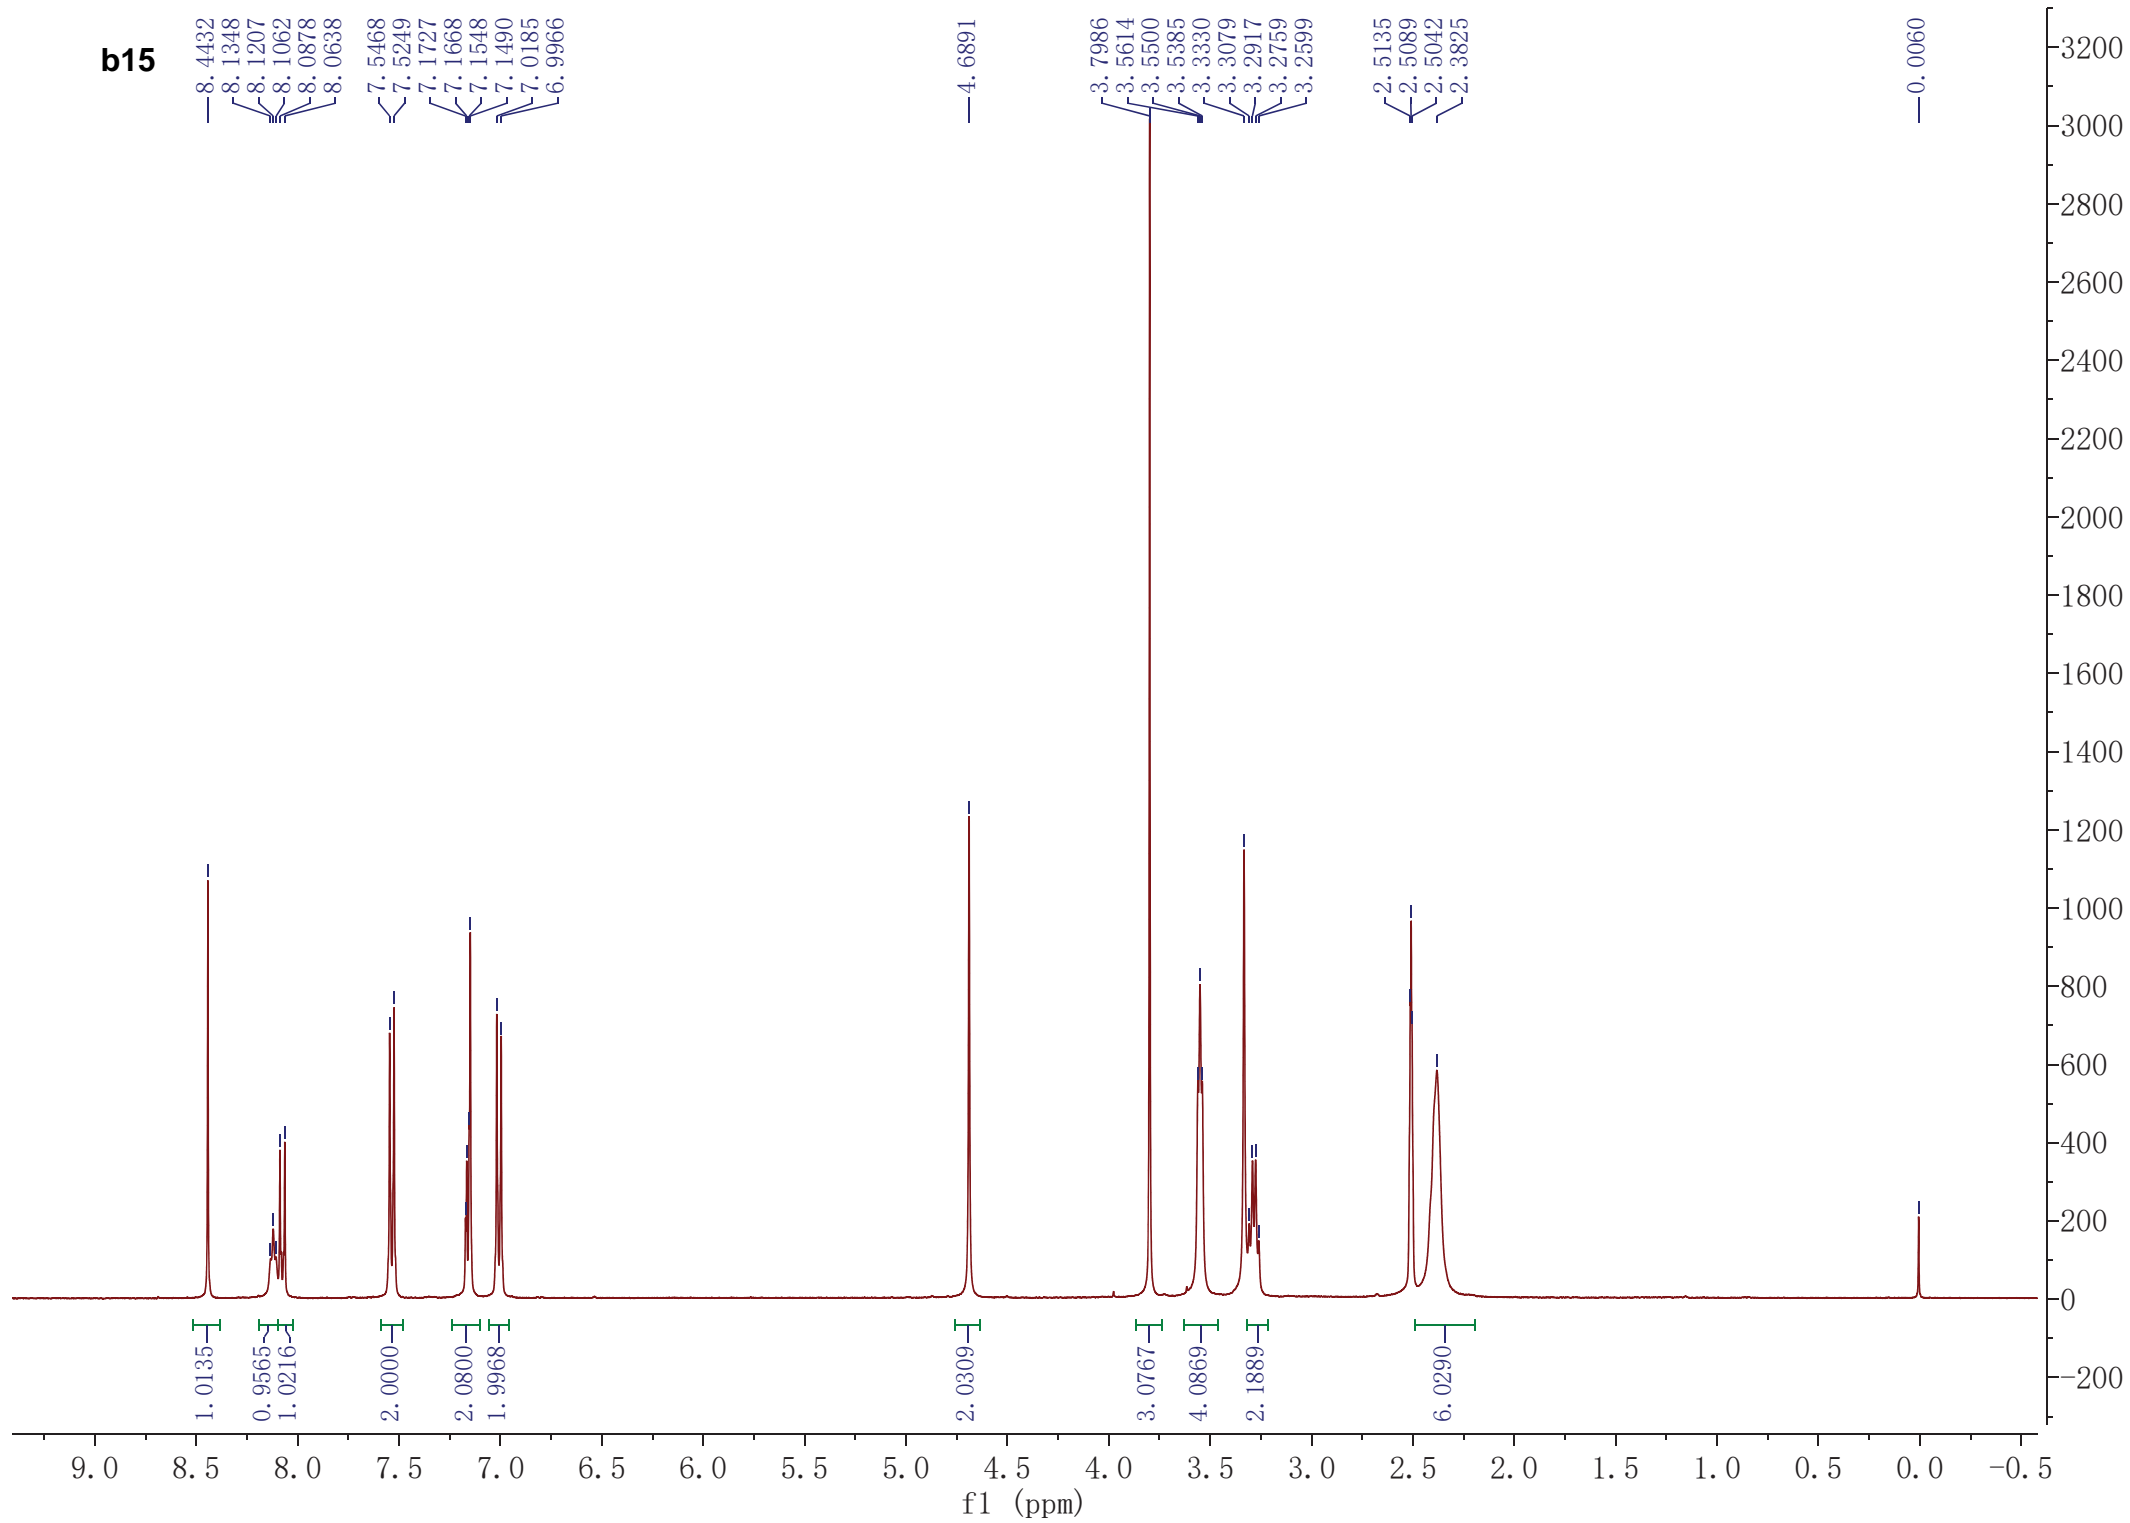



—12.8455

**b16**

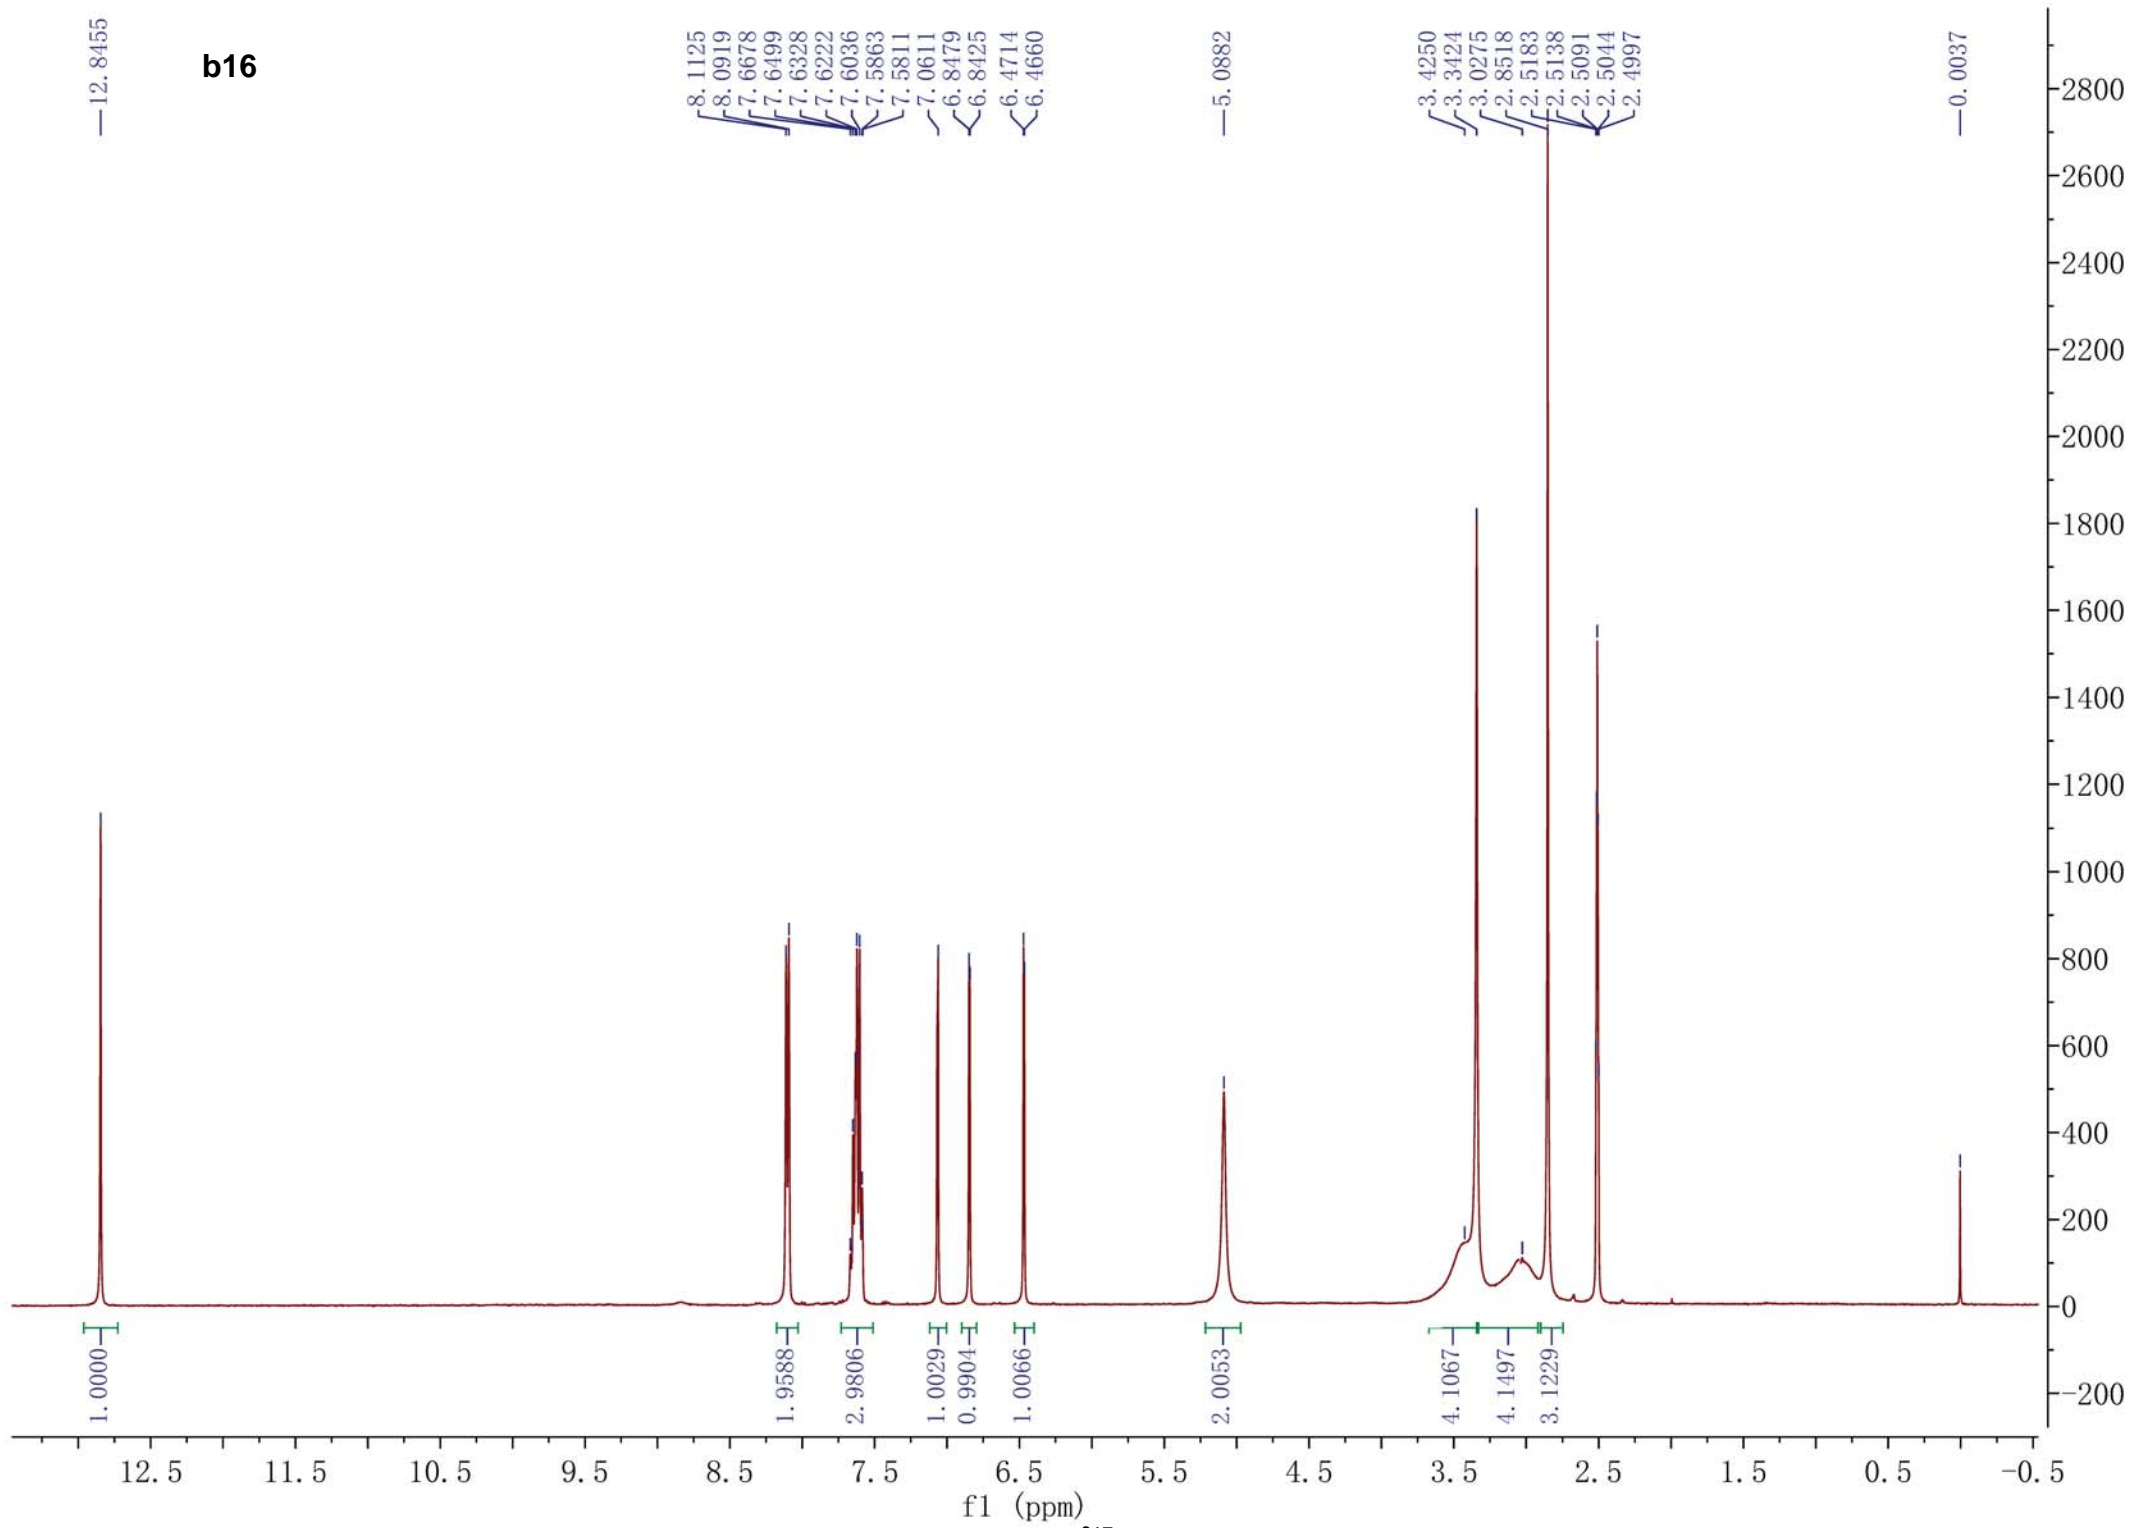

**b17**

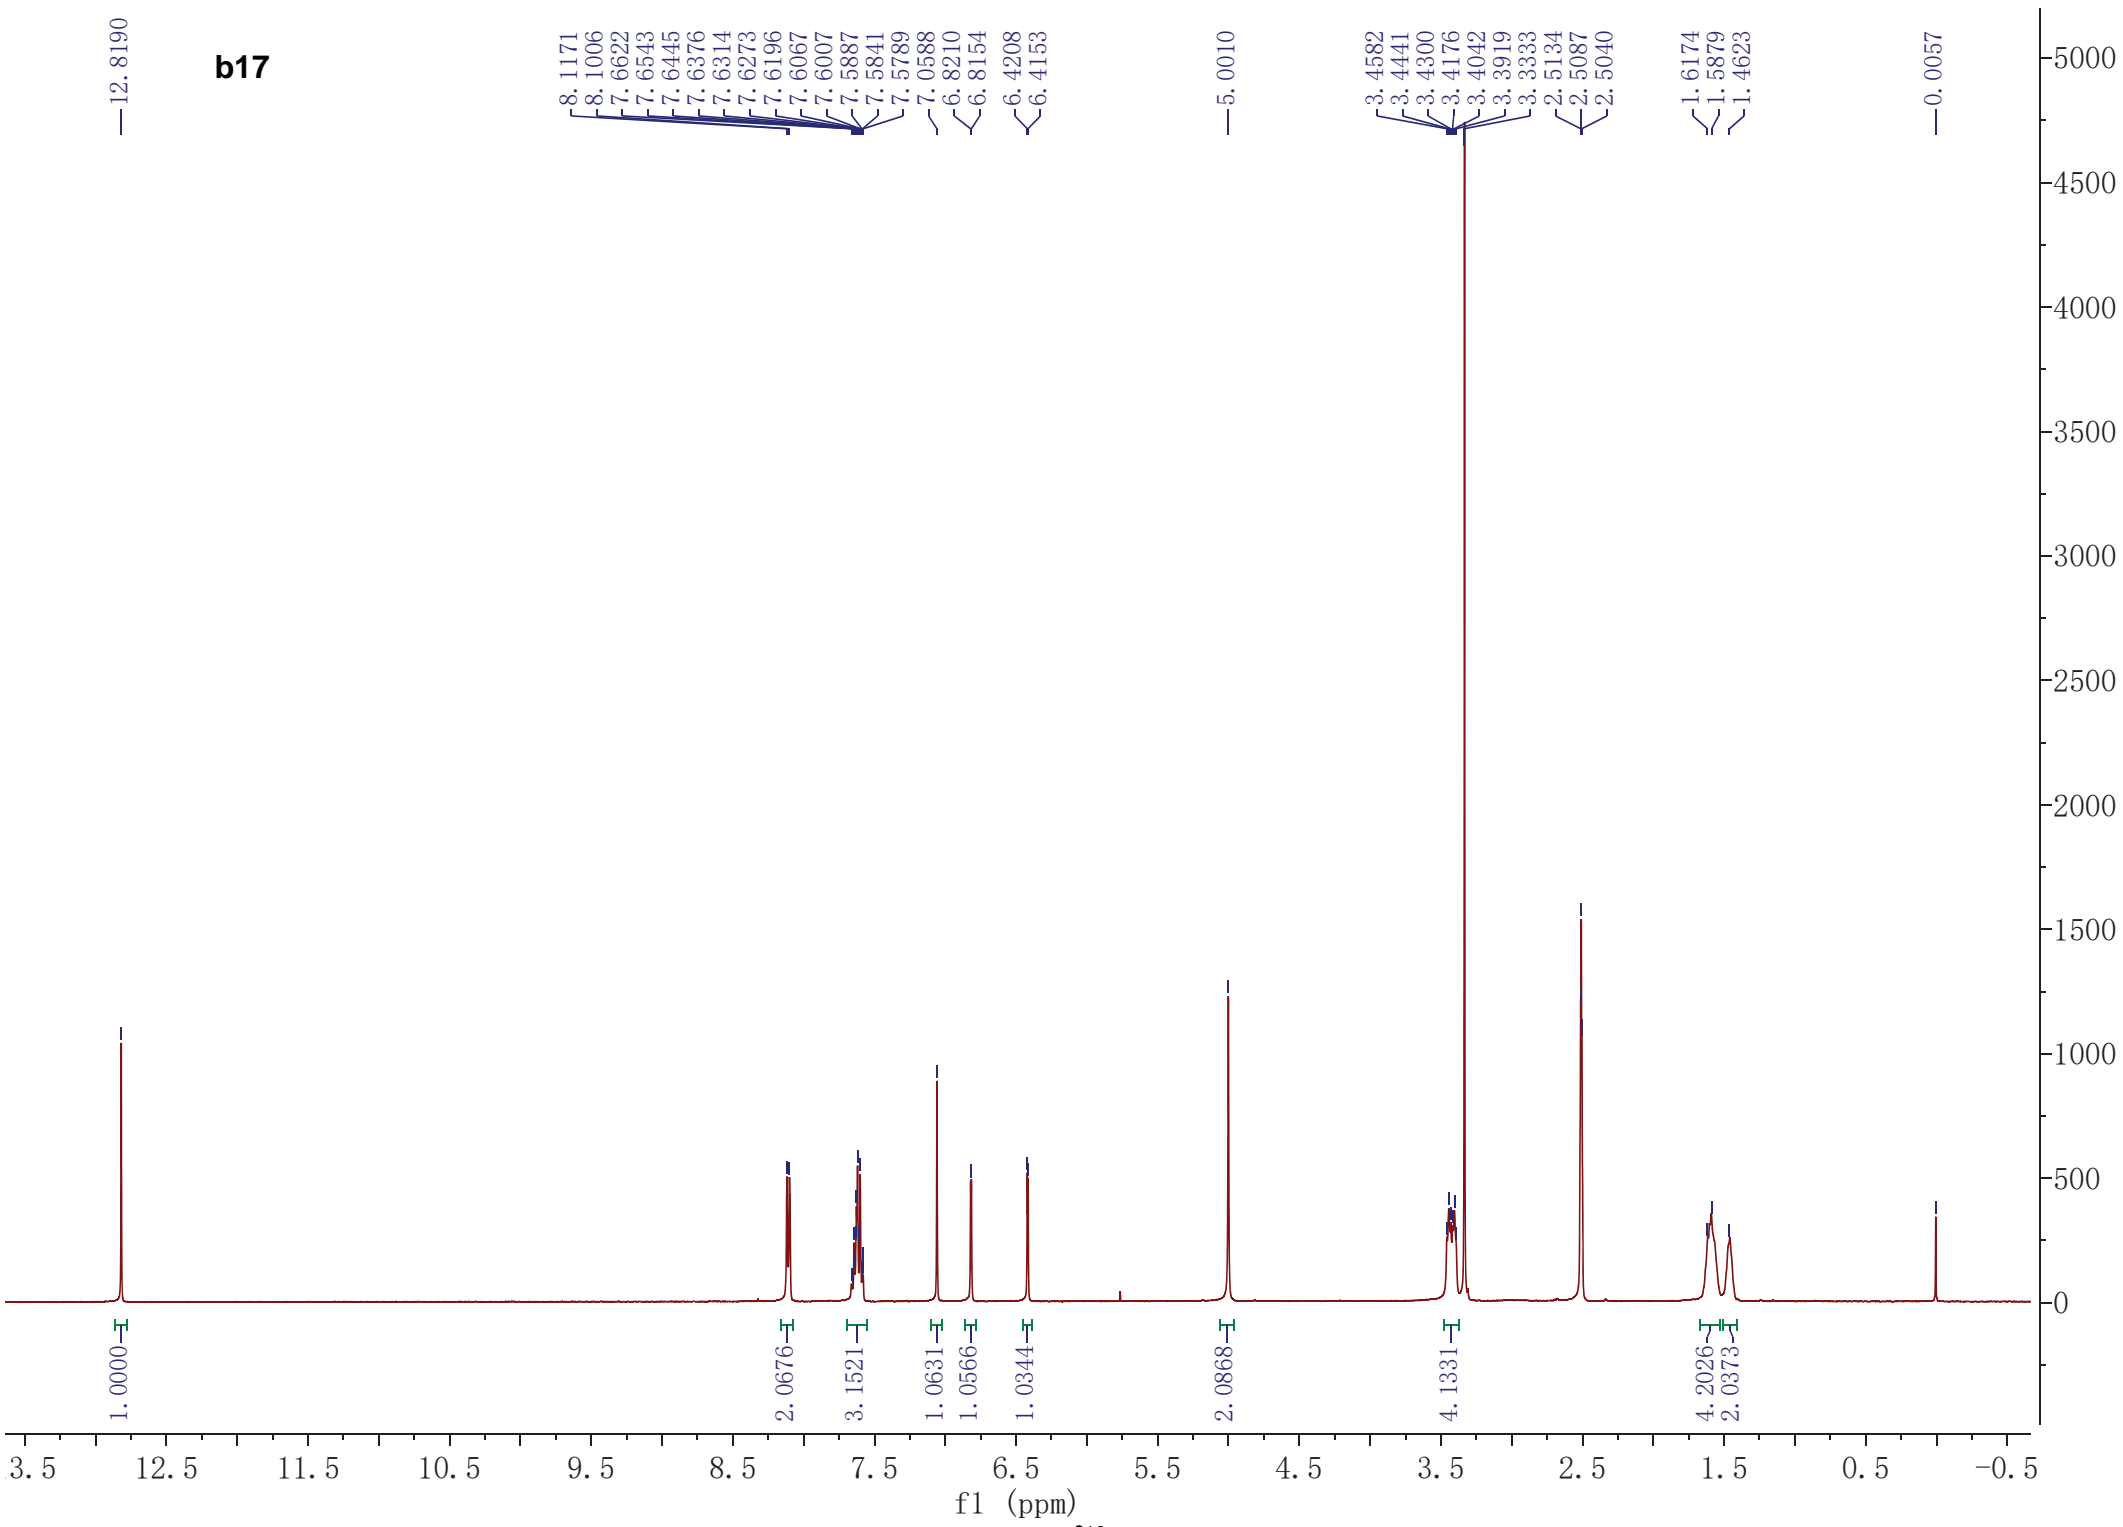

— 12.8202

**b18**

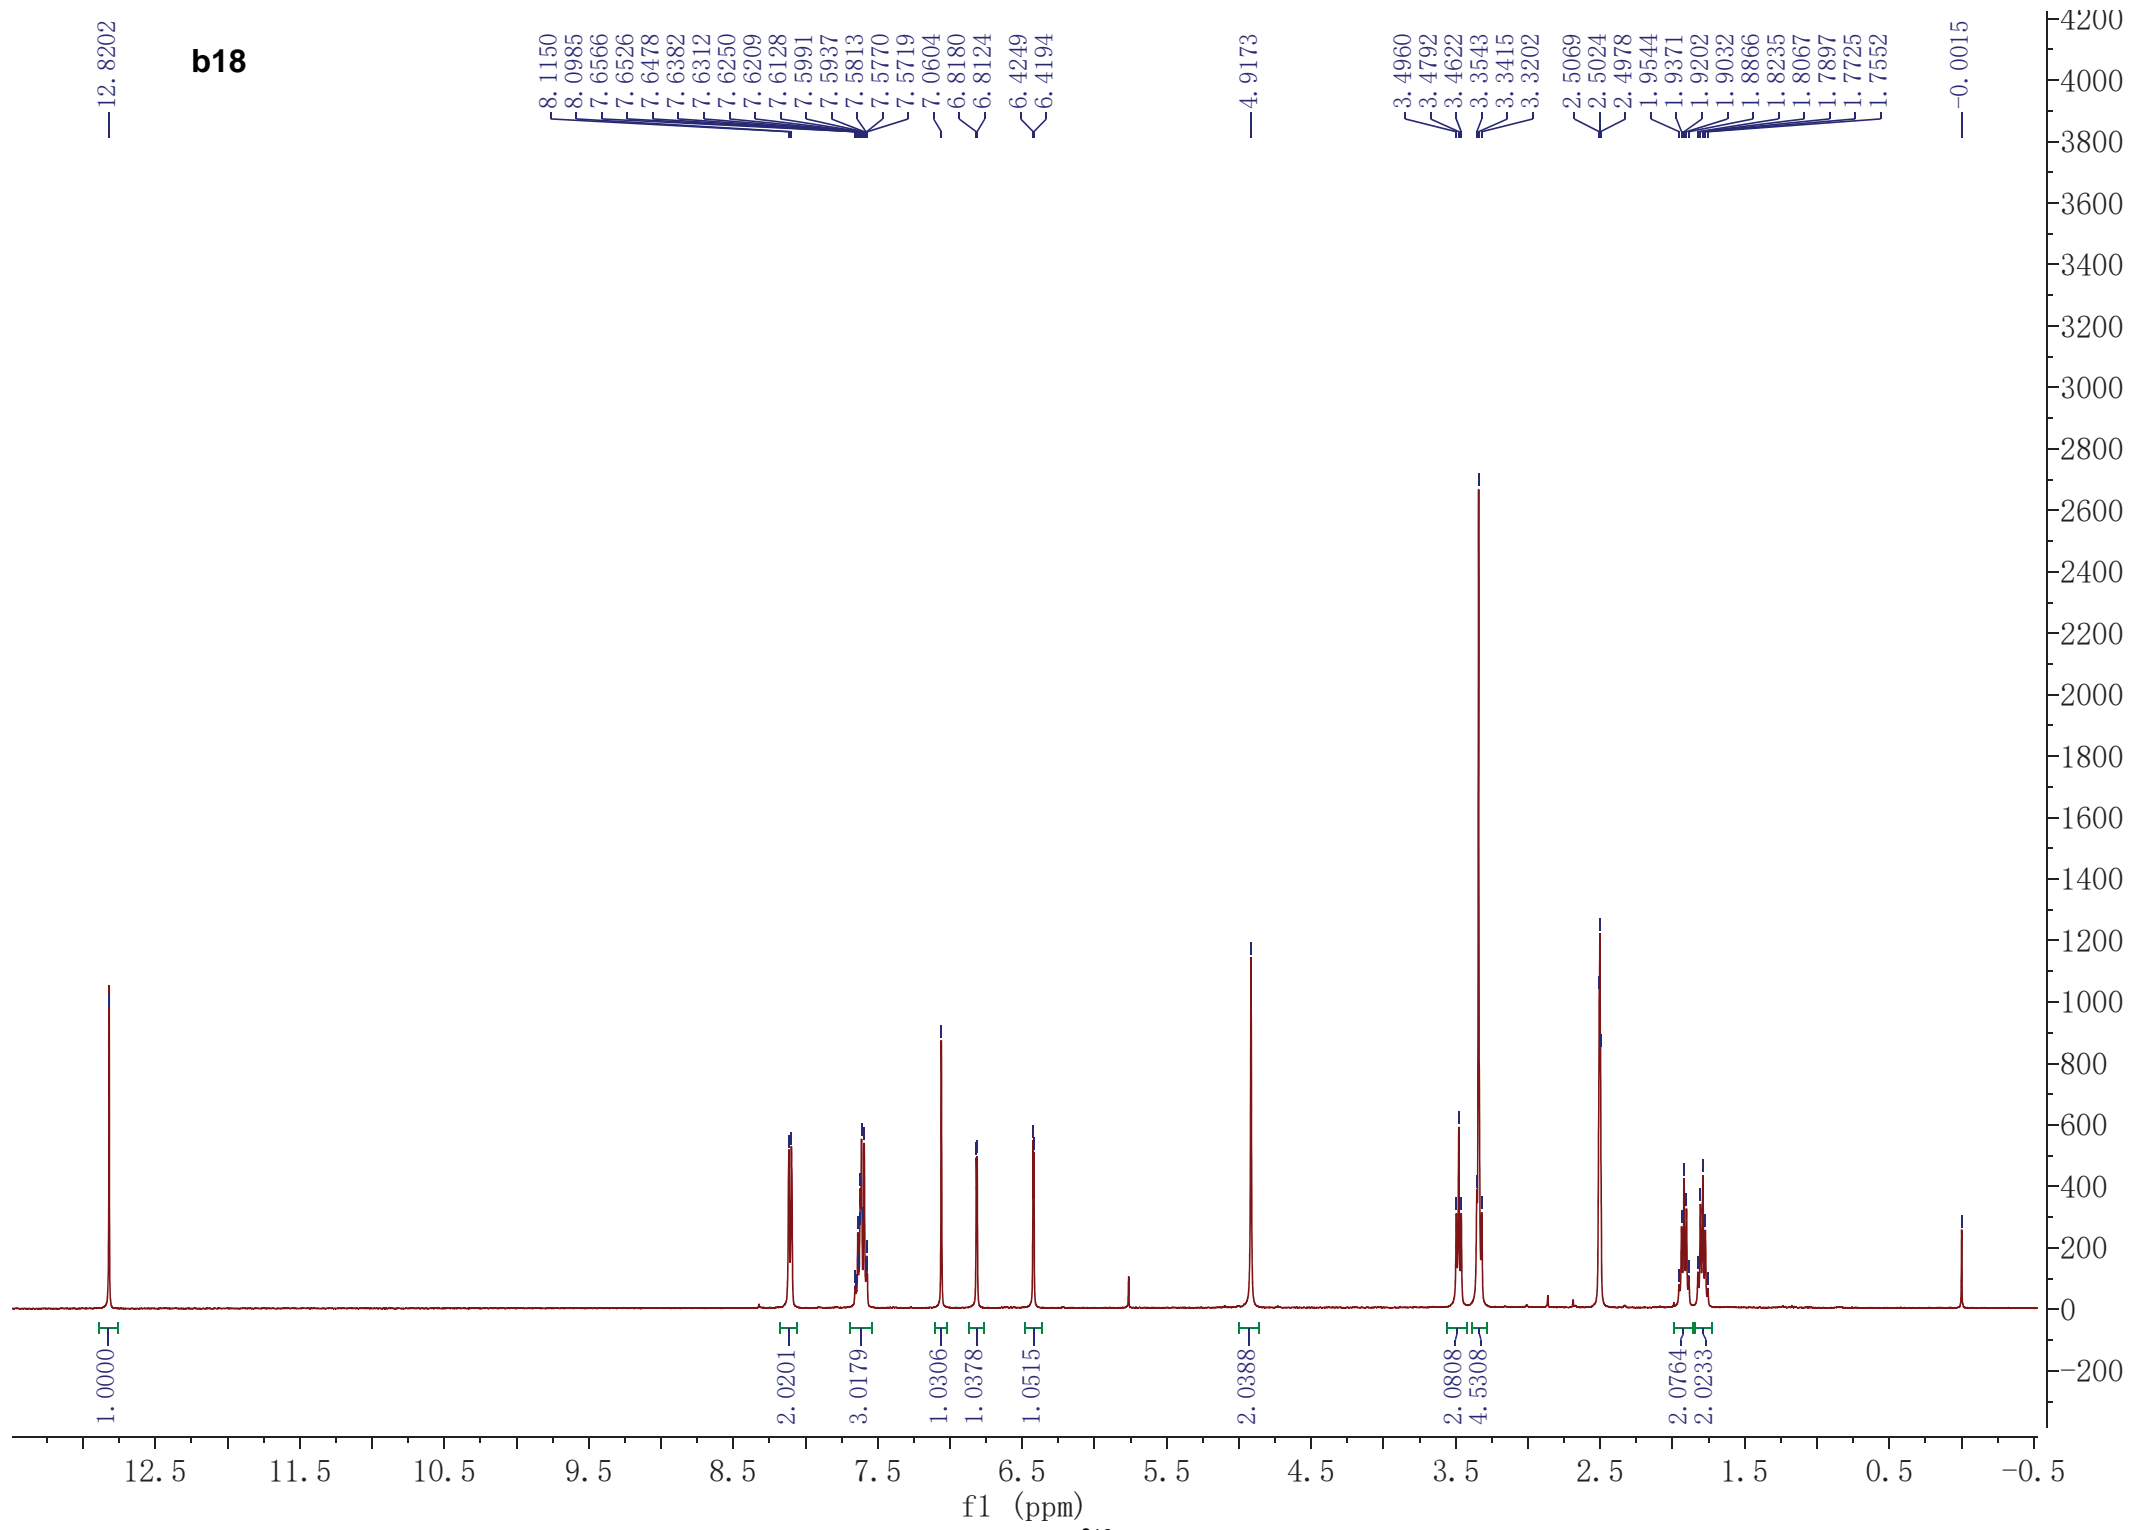

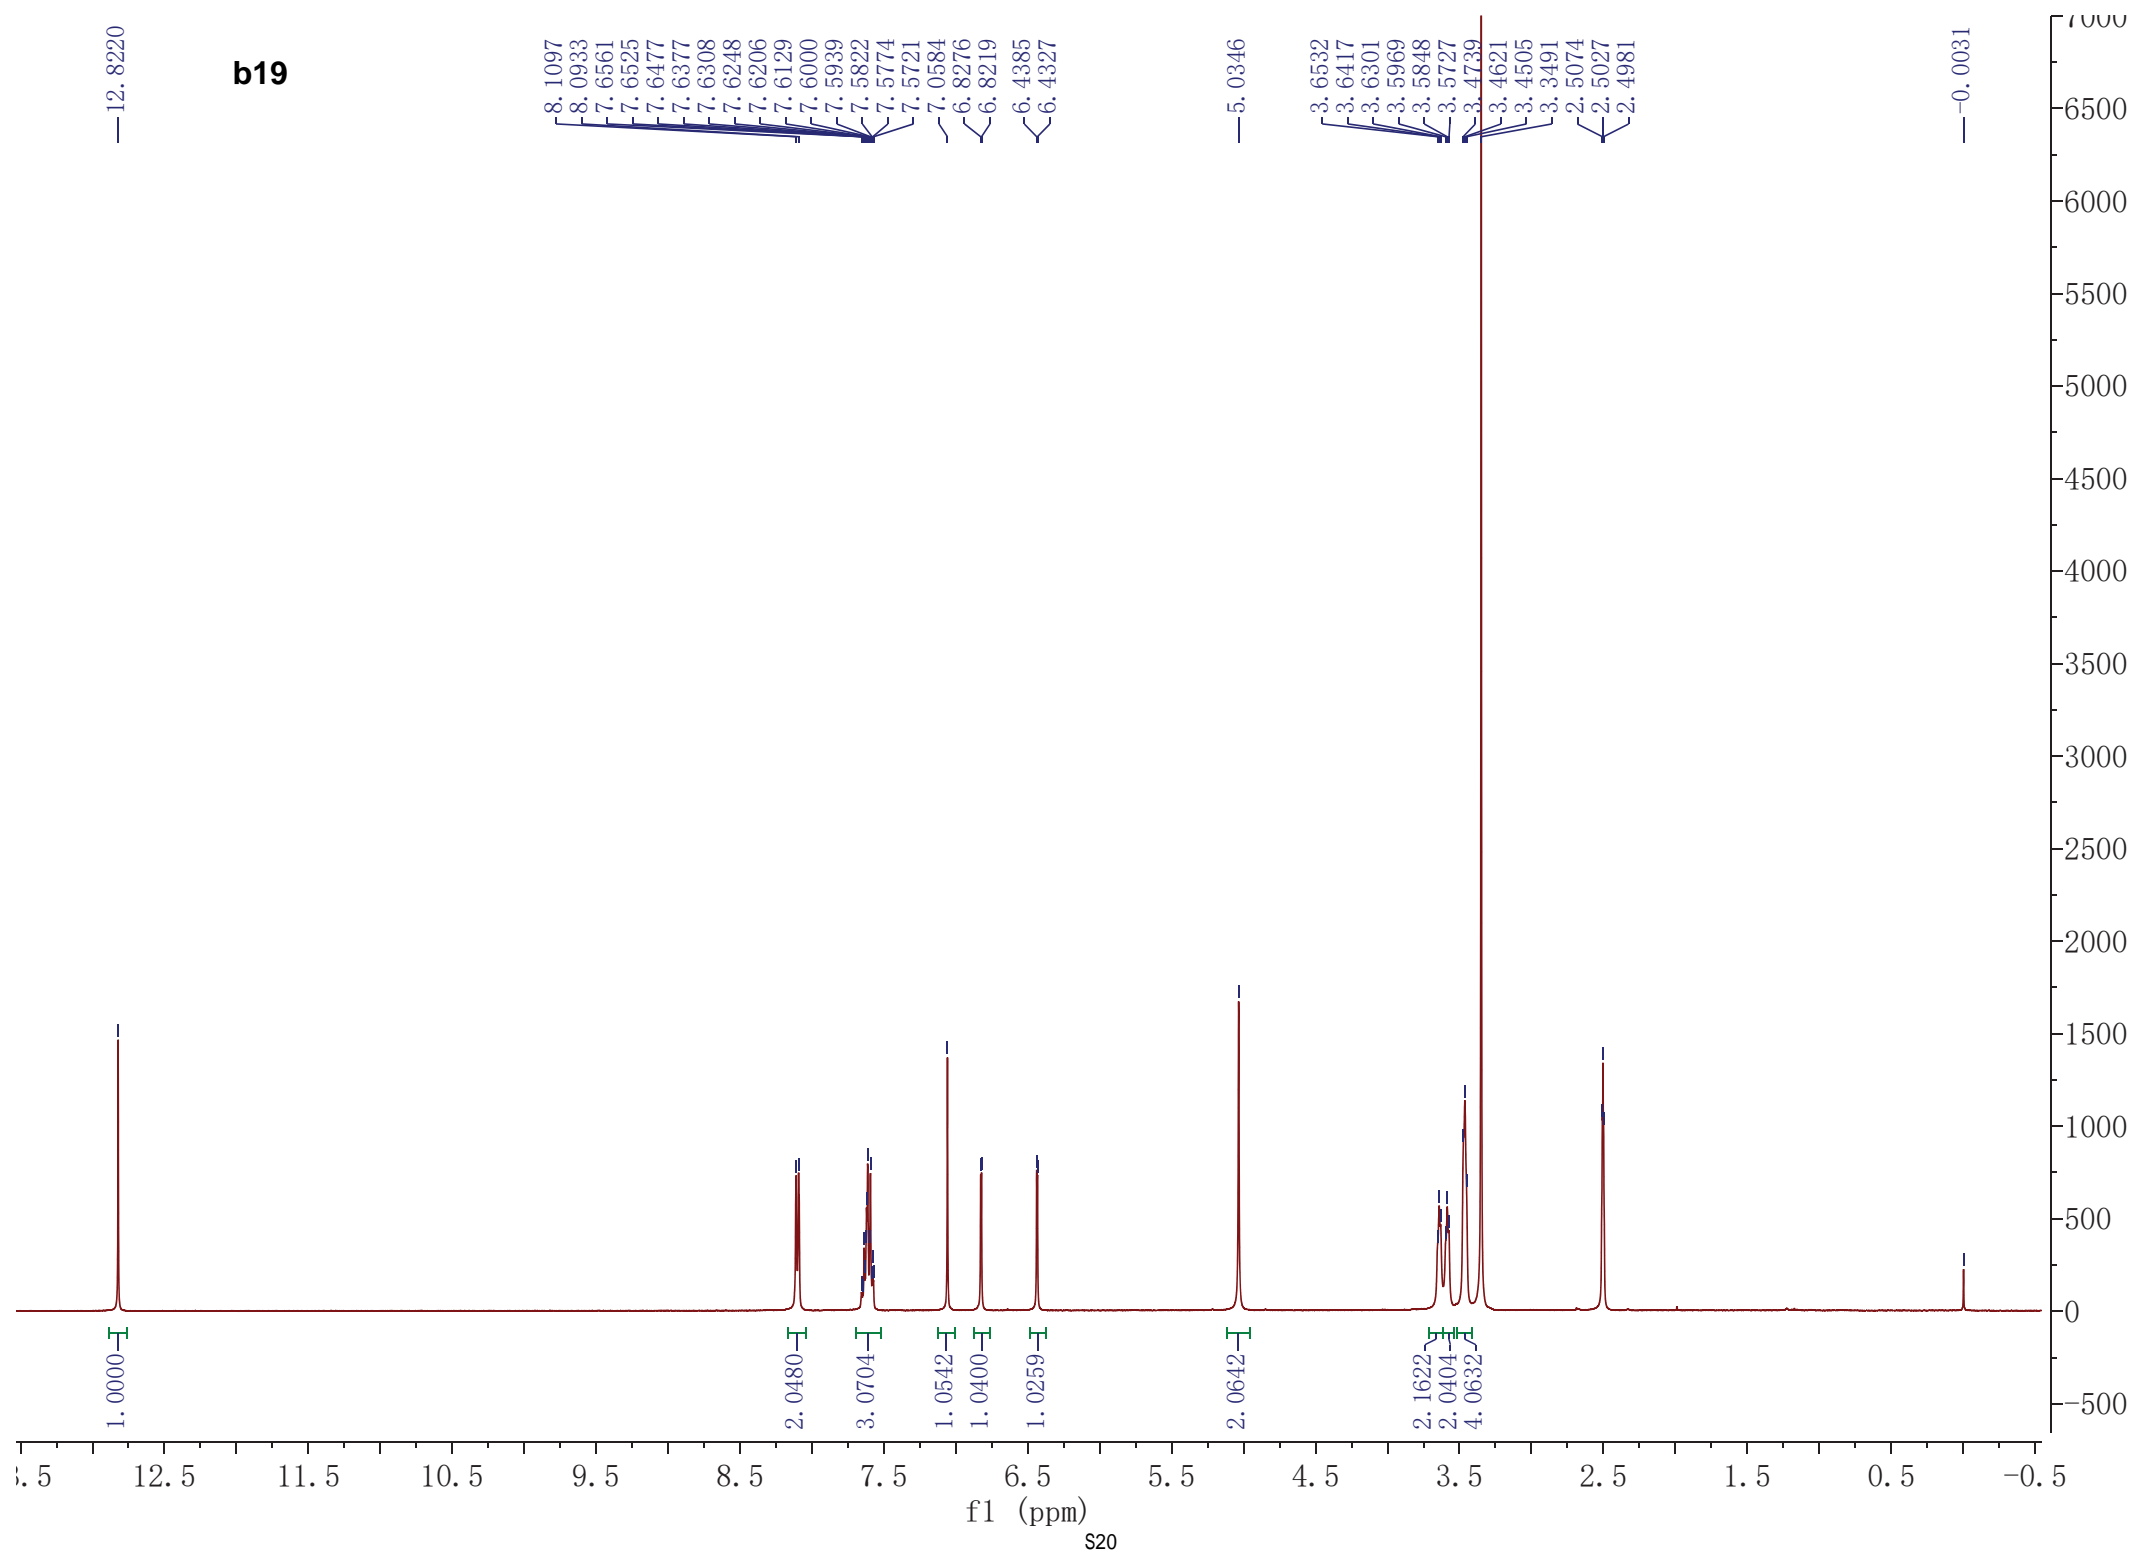

**b19**

f1 (ppm)

s20

—12.8316

**b20**

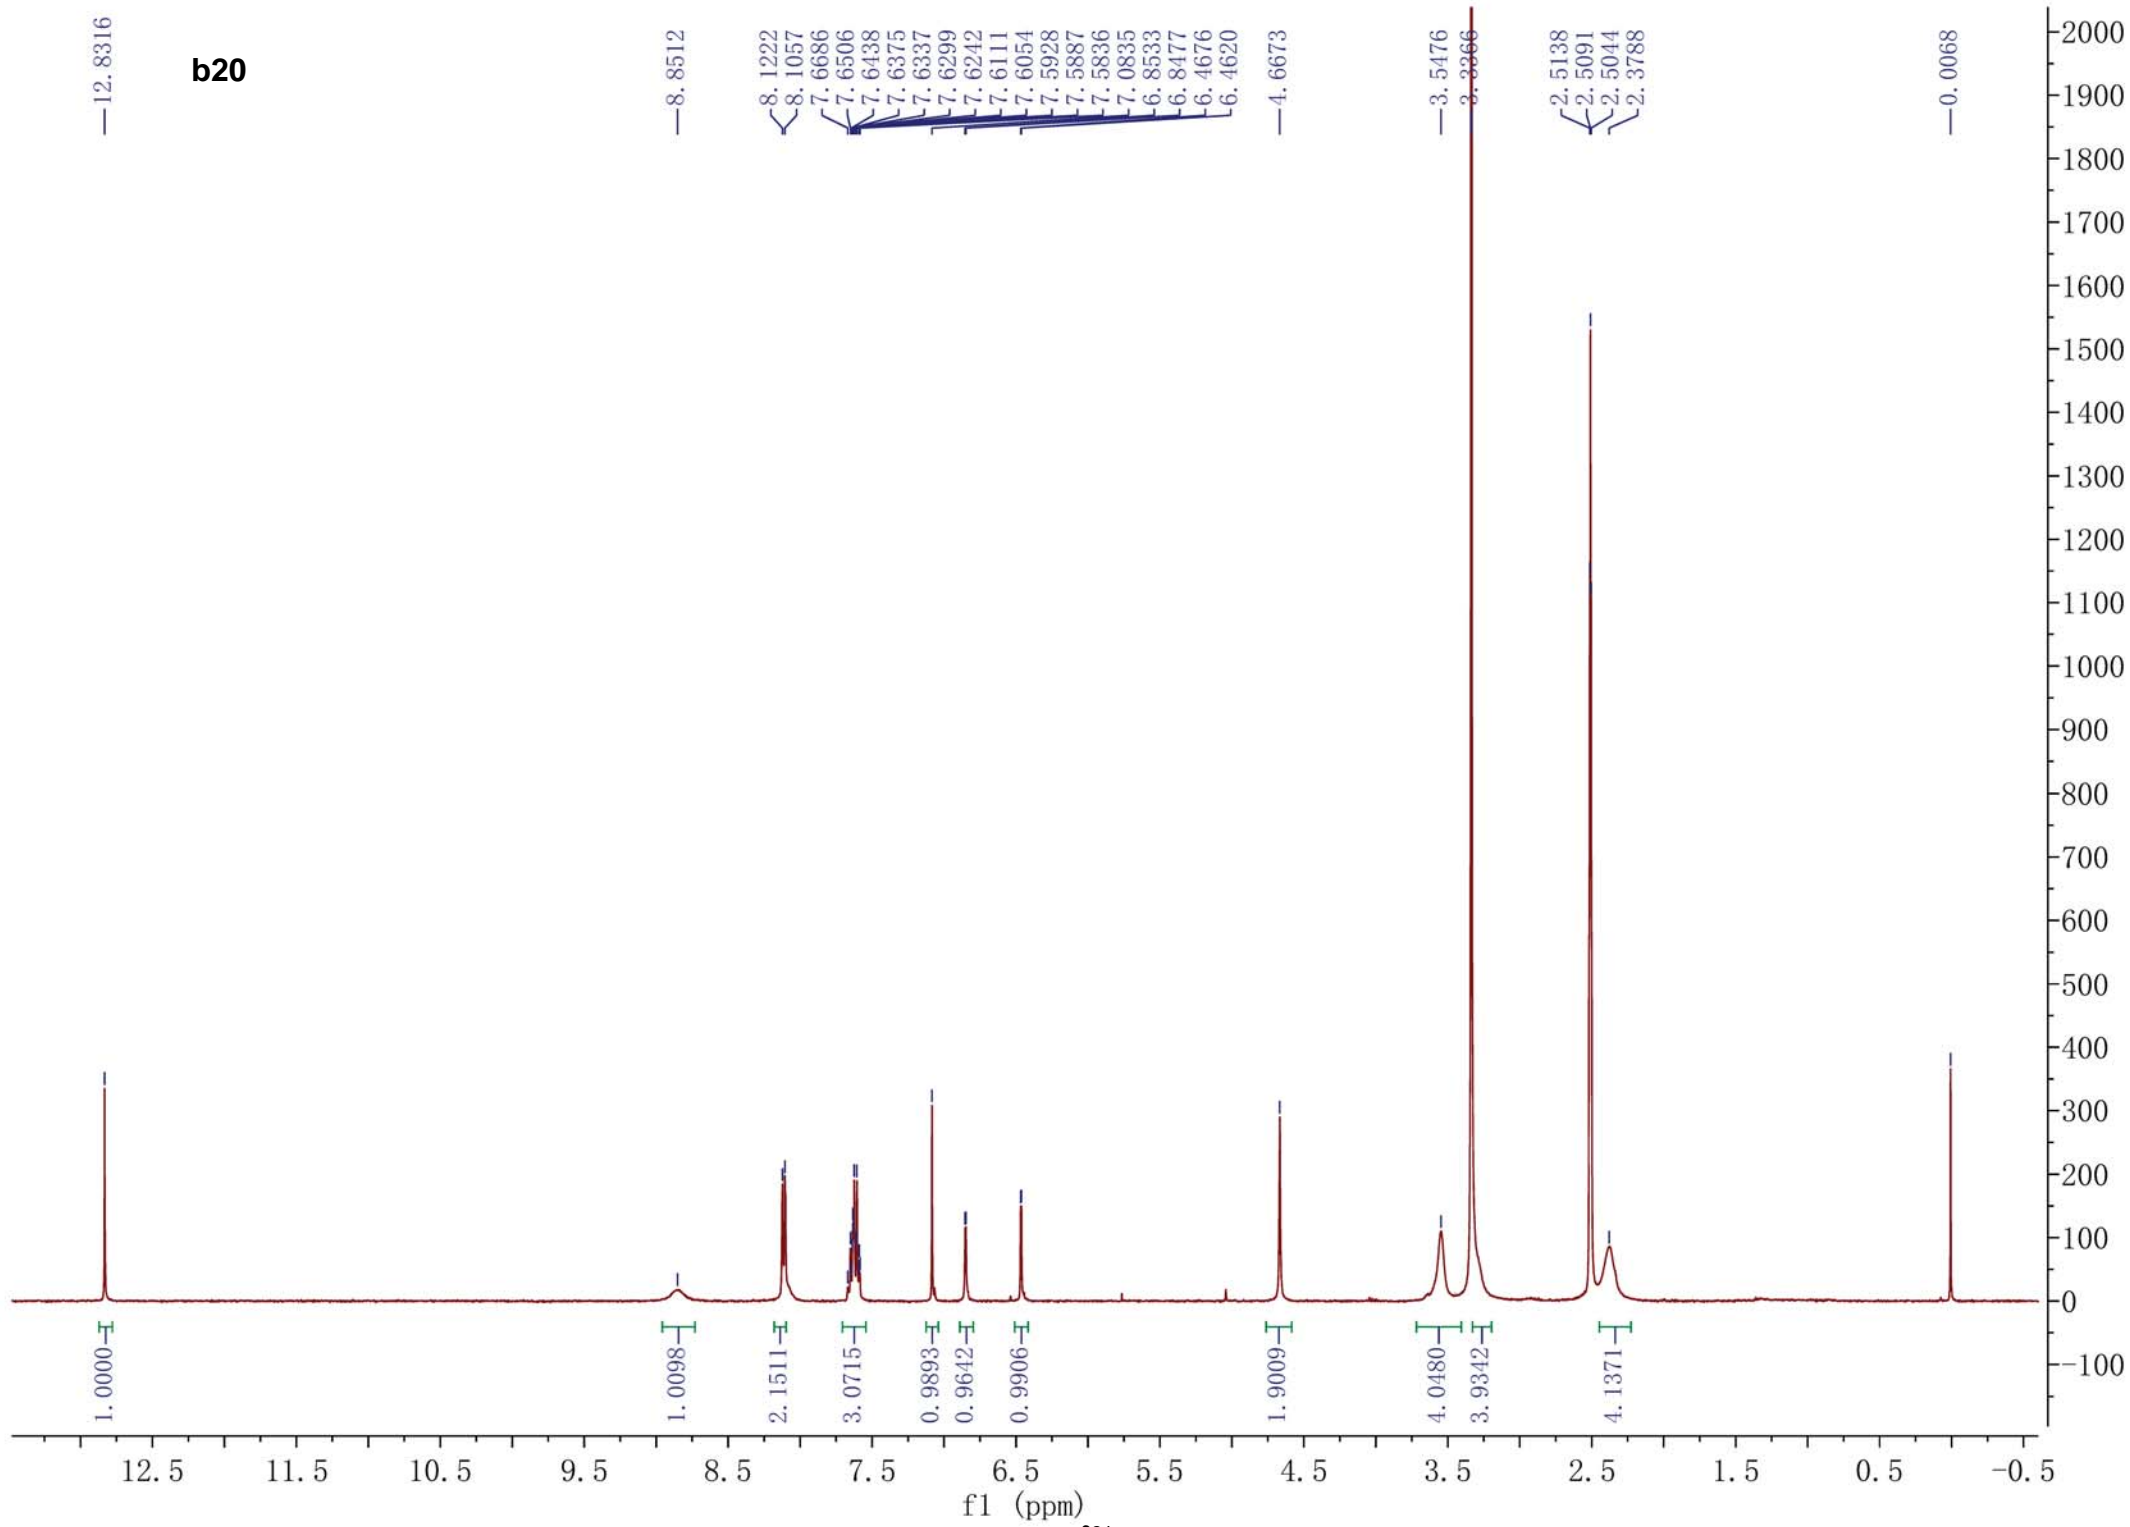

Supplement: c6ra28061g1.pdf [file c6ra28061g1.pdf]
